# Supplementary material
Source: PubMed Central journal article supplement (PMC2993248)
Supplement: NIHMS252612-supplement-SOM.pdf [file NIHMS252612-supplement-SOM.pdf]

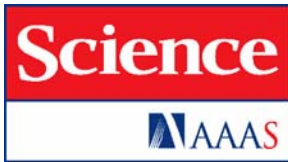

## Supporting Online Material for

### **Genomic Analysis of Organismal Complexity in the Multicellular Green Alga *Volvox carteri***

Simon E. Prochnik, James Umen,<sup>†</sup> Aurora Nedelcu, Armin Hallmann, Stephen M. Miller, Ichiro Nishii, Patrick Ferris, Alan Kuo, Therese Mitros, Lillian K. Fritz-Laylin, Uffe Hellsten, Jarrod Chapman, Oleg Simakov, Stefan A. Rensing, Astrid Terry, Jasmyn Pangilinan, Vladimir Kapitonov, Jerzy Jurka, Asaf Salamov, Harris Shapiro, Jeremy Schmutz, Jane Grimwood, Erika Lindquist, Susan Lucas, Igor V. Grigoriev, Rüdiger Schmitt, David Kirk, Daniel S. Rokhsar<sup>†</sup>

<sup>†</sup>To whom correspondence should be addressed. E-mail: [umen@salk.edu](mailto:umen@salk.edu) (J.U.); [dsrokhsar@gmail.com](mailto:dsrokhsar@gmail.com) (D.S.R.)

Published 9 July 2010, *Science* **329**, 223 (2010)  
DOI: 10.1126/science.1188800

#### **This PDF file includes:**

Materials and Methods  
SOM Text  
Figs. S1 to S8  
Tables S1 to S16  
References

# Supplemental Online Material for the Genomic analysis of organismal complexity in the multicellular green alga *Volvox carteri*

## Table of Contents

|                                                                                                  |    |
|--------------------------------------------------------------------------------------------------|----|
| 1) MATERIALS AND METHODS .....                                                                   | 3  |
| <i>A. Nuclear genome sequencing and assembly</i> .....                                           | 3  |
| <i>B. Comparison and annotation of repeats in Volvox and Chlamydomonas</i> .....                 | 4  |
| B1. Overview of repeat analysis.....                                                             | 4  |
| B2. Analysis of satellite repeats in <i>Volvox</i> and <i>Chlamydomonas</i> .....                | 5  |
| B3. Generation annotation and filtering of RepeatScout Libraries.....                            | 5  |
| <i>C. Analysis of repeat expansions</i> .....                                                    | 7  |
| <i>D. Calculation of corrected 4-fold degenerate transversion (4DTV) distances</i> .....         | 7  |
| <i>E1. Synteny and genomic rearrangements</i> .....                                              | 8  |
| <i>E2. Definition of C-score</i> .....                                                           | 9  |
| <i>F. Loss of synteny through genomic rearrangements</i> .....                                   | 9  |
| <i>G. cDNA library construction and EST sequencing</i> .....                                     | 10 |
| <i>H. Prediction of gene models</i> .....                                                        | 11 |
| <i>I. Volvox has longer introns than Chlamydomonas</i> .....                                     | 13 |
| <i>J. Pfam protein domain assignments</i> .....                                                  | 13 |
| <i>K. Pfam domain combinations unique to Chlamydomonadales</i> .....                             | 13 |
| <i>L. Pfam domain combinations specific to Volvox or specific to Chlamydomonas or both</i> ..... | 14 |
| <i>M. Construction of protein families</i> .....                                                 | 14 |
| <i>N. Volvox-specific genes</i> .....                                                            | 15 |
| <i>O. Chlamydomonas-specific genes</i> .....                                                     | 16 |
| <i>P. Volvocine algae-specific protein families</i> .....                                        | 16 |
| <i>Q. Analysis of Transcription Associated Proteins</i> .....                                    | 17 |
| <i>R. Annotation of genes associated with developmental biological processes in Volvox</i> ..... | 19 |
| Membrane trafficking proteins.....                                                               | 19 |
| Cell cycle proteins.....                                                                         | 19 |
| Cytoskeletal proteins.....                                                                       | 20 |
| Cell wall and extracellular matrix proteins.....                                                 | 20 |
| Phylogenetic analyses.....                                                                       | 20 |
| 2) SUPPORTING TEXT .....                                                                         | 22 |
| <i>A. Volvocine algae as a model for the evolution of multicellularity</i> .....                 | 22 |
| <i>B. The Volvox vegetative life cycle</i> .....                                                 | 23 |
| <i>C. The Volvox sexual cycle</i> .....                                                          | 23 |
| <i>D. The Volvox ECM</i> .....                                                                   | 23 |
| <i>E. Environmental adaptations of Volvox and Chlamydomonas</i> .....                            | 24 |
| 3) SUPPLEMENTAL FIGURES .....                                                                    | 25 |
| Fig. S1: <i>Volvox</i> phylogeny, morphology and development.....                                | 25 |
| Fig. S2: The algae of the volvocine lineage.....                                                 | 27 |
| Fig. S3: Schematic diagram of ECM in <i>Volvox</i> .....                                         | 29 |
| Fig. S4: Histograms of Jukes-Cantor distance between repeats.....                                | 31 |
| Fig. S5: Synteny dotplot between <i>Volvox</i> and <i>Chlamydomonas</i> genomes.....             | 33 |
| Fig. S6: Intron lengths in <i>Volvox</i> and <i>Chlamydomonas</i> .....                          | 35 |
| Fig. S7: Scatter plot of family size in transcription associated proteins.....                   | 37 |
| Fig. S8: Diversification of <i>Volvox</i> matrix metalloprotease family.....                     | 39 |
| 4) SUPPLEMENTAL TABLES .....                                                                     | 41 |

|                                                                                                                                                                                         |    |
|-----------------------------------------------------------------------------------------------------------------------------------------------------------------------------------------|----|
| Table S1: Summary of repeats in <i>Volvox</i> and <i>Chlamydomonas</i> genomes .....                                                                                                    | 41 |
| Table S2: Genome evolution in green algae, animals, plants and diatoms.....                                                                                                             | 42 |
| Table S3: Counts of filtered genes that were used to build syntenic blocks.....                                                                                                         | 42 |
| Table S4: Counts of <i>Volvox</i> and <i>Chlamydomonas</i> genes making up syntenic blocks with selected numbers of<br>intervening genes allowed for real and scrambled gene order..... | 42 |
| Table S5: Counts of gene models predicted in <i>Volvox</i> by initial automated annotation, classified by method.....                                                                   | 43 |
| Table S6: EST and homology evidence supporting initial <i>Volvox</i> and <i>Chlamydomonas</i> gene models .....                                                                         | 44 |
| Table S7: Gene structure statistics of <i>Volvox</i> and <i>Chlamydomonas</i> gene models.....                                                                                          | 44 |
| Table S8: Comparison of <i>Volvox</i> genome statistics to selected other genomes.....                                                                                                  | 45 |
| Table S9: Pfam domain counts and combinations in <i>Volvox</i> and <i>Chlamydomonas</i> compared to selected other<br>species.....                                                      | 46 |
| Table S10: Complete predicted protein sets used to build protein families.....                                                                                                          | 46 |
| Table S11: Protein family size distribution in <i>Volvox</i> and <i>Chlamydomonas</i> .....                                                                                             | 48 |
| Table S12: <i>Volvox</i> -specific gene models with EST evidence.....                                                                                                                   | 48 |
| Table S13: <i>Chlamydomonas</i> -specific gene models with EST support.....                                                                                                             | 49 |
| Table S14: Proteins involved in processes that are associated with increased developmental complexity in<br><i>Volvox</i> relative to <i>Chlamydomonas</i> .....                        | 49 |
| Table S15: Predicted numbers of TAPs .....                                                                                                                                              | 55 |
| Table S16: Summary of RepeatScout libraries .....                                                                                                                                       | 58 |
| 5) SUPPLEMENTAL REFERENCES .....                                                                                                                                                        | 59 |

# 1) MATERIALS AND METHODS

## A. Nuclear genome sequencing and assembly

We prepared high quality genomic DNA from a vegetative culture of female *Volvox carteri f. nagariensis*, Eve (S1), a subclone of HK10 (S2, 3), which is a standard female lab strain of *Volvox carteri* (hereafter *Volvox*) that was originally isolated in 1965 by Richard Starr from a pond associated with a rice paddy near Kobe, Japan. The genomic DNA was prepared by a standard protocol involving CsCl gradient banding to separate it from RNAs (S1), but it could not be separated from chloroplast and mitochondrial DNA. The genome sequences of these two organelles have already been determined (S4).

Paired-end whole-genome shotgun (WGS) sequencing (S5) of three libraries with insert sizes of 2-3 kb (AOBN); 6-8 kb (ABSY) and 35-40 kb (AOBO) generated 1,430,397, 1,269,395 and 230,112 reads respectively, covering 1,361, 1,310 and 235 Mb raw sequence respectively, together totaling 2,906 Mb of raw sequence. The reads were screened for vector sequence using Cross\_match (S6) and trimmed for vector and low quality sequences. Reads shorter than 100 bases after trimming were excluded from the assembly leaving 1,343,753 2-3 kb insert reads (94%, 836 Mb of sequence); 1,207,057 6-8 kb insert reads (95% 760 Mb) and 224,372 35-40 kb insert reads (98%, 113 Mb).

The filtered and trimmed read sequences were assembled using JAZZ 1.0.3 (S7). A word size of 14 was used for seeding alignments between reads. The 'unhashability threshold' parameter was set to 40, meaning that words present over 40 times in the data set were not used to seed alignments. A mismatch penalty of -30.0 was used that generally allows assembly of sequences that are more than ~97% identical.

The initial assembly contained 147.4 Mb of scaffold sequence, of which 12.5 Mb (8.5%) was gaps. There were 7,391 scaffolds, with a scaffold N50/L50 of 35/1.41 Mb, and a contig N50/L50 of 795/42.7 kb. Scaffolds < 1 kb long as well as redundant scaffolds (those scaffolds shorter than 5kb long with >80% identity to another scaffold whose length was greater than 5kb) were removed from the assembly. This left 141.5 Mb of scaffold sequence, of which 12.4 Mb (8.8%) was gaps. The filtered assembly contained 1,327 scaffolds, with a scaffold N50/L50 of 33/1.50 Mb, and a contig N50/L50 of 729/45.4 kb. The sequence depth derived from the assembly was  $11.1 \pm 0.2$ .

To estimate the completeness of the assembly with respect to transcribed genes, 72 *Volvox* mRNAs that were known prior to the genome project were downloaded from the nr database at NCBI (S8) and aligned to the assembly using BLAT (S9) with default parameters. All 72 mRNAs had hits to the assembly with >97% identity over most of their lengths.

As a second test of completeness relative to transcribed loci, we considered 129,528 dideoxy-sequenced ESTs that had  $\leq 40\%$  of unmasked sequence after removal of low complexity and simple repeat regions (see below). Of these ESTs, 127,056 (98.0%) aligned to the assembly with BLAT (S9) ( $>90\%$  identity over  $> 50\%$  of their length). The 2,472 filtered ESTs that did not align to the genome were examined further. Approximately 1/3 (857) had hits with BLASTX (S10) (E-value  $< 1e-10$ ) to known proteins from the UniProt database (S11). These included 408 ESTs (48% of unmapped ESTs with hits) with best hits to proteins annotated as “ribosomal protein” and 93 ESTs (11% of unmapped ESTs with hits) so annotated as related to chlorophyll binding. We do not rule out the possibility that these and other unmapped ESTs are derived from loci not included in the genome assembly because they are embedded in repetitive sequence. Overall, we can conservatively estimate that the completeness of the *Volvox* genome assembly with respect to transcribed loci captured by ESTs is likely better than 98%.

## **B. Comparison and annotation of repeats in *Volvox* and *Chlamydomonas***

### **B1. Overview of repeat analysis**

The *Volvox* genome assembly is 19,621,448 bp longer than that of *Chlamydomonas reinhardtii* (hereafter *Chlamydomonas*) (Table 1). We compared the repeat content of the two genomes to determine the contribution made by repeats to the difference in genome size. To do this, we built and annotated a custom repeat library for each algal genome and ran RepeatMasker (S12) on each assembly with the appropriate custom repeat library and the ‘-gccalc’ option (Table S1).

The custom *Volvox* repeat library was assembled from five component libraries:

- i) 45 *Volvox carteri*-specific and 72 *Chlamydomonas*-specific repeat sequences from RepBase (20080611 update) (S13);
- ii) 147 sequences that had been generated by analysis of the *Chlamydomonas* genome (S14);
- iii) 33 repeat elements from the *Volvox* assembly that were generated using the same approach as had been used previously for the *Chlamydomonas* genome (S14). (We estimate the curated set from the *Volvox* genome is 20-25% complete);
- iv) a library of 1,704 satellite repeat sequences (with lengths ranging from 20 to 1,162 bp) built by searching the whole genome shotgun reads for over-represented 16-mers and assembling overlapping 16-mers (as described below), and

v) 1,511 repeats identified by RepeatScout (S15) (Table S16). The repeat sets were annotated and filtered leaving 1,449 sequences (as described below).

In parallel, a custom *Chlamydomonas* repeat library was assembled from:

i) *Volvox*- and *Chlamydomonas*-specific repeat sequences from RepBase (20080611 update) (S13));

ii) 147 *Chlamydomonas* repeat sequences identified as in ii) above;

iii) 33 *Volvox* repeats identified as in iii) above;

iv) a library of 100 satellite sequences (with lengths 25, 92, 107, 181 or 184 bp) (see below) and

v) 1,057 repeats identified by RepeatScout. After filtering the library contained 1,013 repeats (Table S16 and see below).

## **B2. Analysis of satellite repeats in *Volvox* and *Chlamydomonas***

A library of all 16 nt long sequences (16-mers) that occur at least 500 times was generated from approximately half the WGS reads (all reads from the AOBN library). 16-mers that overlap each other were assembled into longer sequences by repeatedly looking for 15 nt overlaps and extending by a single nucleotide overhang until either no further extensions were possible (in which case extensions in the opposite direction were explored) or the sequence looped back on itself. Both the sequences that could not be extended further and the circular sequences were added to the library of putative satellite sequences as long as they were at least 20 nt long.

## **B3. Generation annotation and filtering of RepeatScout Libraries**

Generation of libraries of repeats with RepeatScout (S15) and their subsequent filtering and annotation was accomplished as follows. First, RepeatScout was run on the *Volvox* assembly. This produced a library of 1,511 repeat sequences (Table S16). Next RepeatScout was run on the *Chlamydomonas* assembly, generating 1,057 sequences. The repeat sequences in these two libraries were classified as described in the set of rules below.

To annotate and filter repeat sequences in the RepeatScout libraries generated from the *Volvox* and *Chlamydomonas* genomes, we first masked the *Volvox* genome with the 1,511 sequence RepeatScout library using RepeatMasker (S12) with the '-gccalc' option. We then counted the number of times each repeat sequence hit the genome. We also counted the percentage of repeat instances in the genome that also overlapped gene models and ESTs by two criteria:  $\geq 200$  nt length and  $\geq 80\%$  of the length of the repeat. Sequences in the repeat library were

assigned Pfam domains by running HMMPFAM, part of the HMMER package (S16), on the library with an E-value cutoff of  $1E-5$ . Repeat sequences with Pfam domain assignments were sub-divided into those with a TE-associated Pfam (PF00075, PF00078, PF00665, PF03372, PF03732, PF07727, PF01527) and those with non-TE associated Pfam domains (all other Pfam domains). We also ran tRNAScan-SE (S17) on the repeat sequences.

To assign TE classes to sequences in the *Volvox* RepeatScout library that have homology to known TE classes, we ran RepeatMasker on the *Volvox* RepeatScout library with each of two repeat libraries (as these two libraries contain partially overlapping sequences): in the first run, the custom library of repeats that we had curated manually (see above) was used to mask the RepeatScout repeat library; in the second run, RepeatMasker was run with the option '-species chlamydomonadales' to use the volvocine algae repeat sequences in the 20080611 release of RepBase Update (S13). In cases where the longest repeat that masked a RepeatScout library sequence was in the class 'Simple\_repeat' or 'Low\_complexity', this annotation was ignored as RepeatMasker has dedicated algorithms for finding repeats of these two classes that are based solely on sequence composition, rather than homology to known TEs. In cases where the longest annotation in the RepeatScout repeat sequence was not a Simple\_repeat or non Low\_complexity-repeat, the repeat sequence was assigned the class 'Complex\_repeat'. If the RepBase Update library found a complex repeat and our curated library did not, then the complex repeat that was found was used for the classification.

For all the sequences still without a 'Complex\_repeat' classification, in which either RepeatMasker detected a tRNA in the sequence or tRNAScan-SE predicted a tRNA with score  $> 22$  and the length of the repeat  $< 120$  nt, the repeat was given the classification 'tRNA'.

Sequences were classified as 'Satellite' or 'rRNA' if RepeatMasker assigned either of these classifications to a sequence.

Sequences that still had not been given a classification and also had Pfam domains were classified 'non\_TE\_PFAM' if the Pfam domain is not associated with TEs or 'TE\_associated\_PFAM' if the Pfam domain is associated with TEs (see above).

122 repeat sequence that still had not been classified met all of the following three criteria and we therefore reasoned that these repeat may be novel and classified them as 'Putative\_novel' (Table S16). The three criteria were:

- i) either there were no instances of the repeat sequence in the genome that overlapped an EST by at least 200 bp or no instances in the genome that overlapped an EST by at least 80% of the length of the repeat sequence;

ii) either there were no instances of the repeat sequence in the genome that overlapped a gene model by at least 200 bp or no instances in the genome that overlapped a gene model by at least 80% of the length of the repeat sequence; and

iii) the length of the repeat was over 500 nt.

The remaining 911 sequences were classified 'Unknown'. To see if these unknown repeats could be classified further, InterProScan (S18) was run on the 911 sequences to assign Pfam domains using specific gathering thresholds for each HMM. This is more accurate than using a single E-value cutoff for all domains. Hits were manually inspected and 62 sequences with Pfams that are not associated with TEs were deleted from the RepeatScout library. This left 1,449 (Table S16).

A parallel analysis in *Chlamydomonas* starting with a RepeatScout library of 1,057 sequences produced a filtered and annotated set of 1,103 sequences (Table S16)

### **C. Analysis of repeat expansions**

The *Volvox* genome was masked with RepeatMasker using the RepeatScout library (see above), which was annotated as described above. All repeat sequences in the *Volvox* genome longer than 500 nt and belonging to a known class of TE were collected and their Jukes-Cantor distance, corrected for multiple substitutions ( $K = -3/4 \times \ln(1 - 4i/3)$ , where  $i$  is percent nucleotide dissimilarity from the repeat consensus) from the RepeatScout consensus repeat sequence were plotted in a histogram (Fig. S4A-C). A parallel analysis was performed for *Chlamydomonas* (Fig. S4D-E).

Bursts of TE expansion appear as secondary peaks in the histogram to the right of the descending curve that starts at a Jukes-Cantor distance of zero. No secondary peaks are apparent in the total repeat histograms for *Volvox* or *Chlamydomonas* (Fig S4A,4D), but they are present in plots for specific TE families such as Gypsy and Copia in *Chlamydomonas* (Figs. S4E,4F).

### **D. Calculation of corrected 4-fold degenerate transversion (4DTV) distances**

The frequency of transversions at the third position of four-fold degenerate codons (4DTV) can be used to measure the rate of neutral evolution as these transversions do not change the amino acid that is encoded. We calculated 4DTV distances between orthologous protein sequences in pairs of genomes using a previously described method (S19). Briefly, we identified a set of mutual best BLASTP hits (MBH) between all predicted proteins in each pair of species and used them to align coding regions. The number of transversions at conserved



four-fold degenerate sites divided by the total number of four-fold degenerate sites gives the 4DTV frequency. This raw calculation is then corrected for multiple substitutions using the formula  $4DTV_C = -1/2\ln(1-2 \times 4DTV_U)$ , where  $4DTV_C$  is the corrected 4DTV and  $4DTV_U$  the uncorrected 4DTV.

## E1. Synteny and genomic rearrangements

Synteny dotplots for *Volvox-Chlamydomonas* and human-chicken are shown in Fig. S5 and reveal the extent of conserved gene order.

We used the updated *Volvox* v2 assembly (<http://genome.jgi-psf.org/Volca1/Volca1.download.ftp.html>) and the *Chlamydomonas* v4 assembly (<http://www.phytozome.net/chlamy>) for the following analysis of synteny between *Volvox* and *Chlamydomonas*. The *Chlamydomonas* v4 assembly has 17 chromosomes and 61 minor scaffolds; the *Volvox* v2 assembly has 434 scaffolds (compared to 1,265 for v1).

At the time of analysis, neither the *Volvox* v2 assembly nor the *Chlamydomonas* v4 assembly had been annotated with gene model annotations so we mapped *Volvox* v1 and *Chlamydomonas* v3.1 transcripts to their respective updated assemblies using blat (S9) with default parameters and taking the best hit to the assembly. After mapping and filtering (see below), 4,349 of the 4,804 (91%) *Volvox* gene models were on scaffolds containing 25 or more genes, permitting useful synteny analysis.

Syntenic segments were constructed between pairs of genomes as follows. We only considered the longest gene model at any locus because the commonest problem with gene prediction for a genome with incomplete EST coverage is truncation.

- 1) Gene models whose translations did not have a WU-BLASTP (S10) hit to the other proteome (E-value < 1E-10) were removed.
- 2) Tandem expansions were collapsed: if two or more neighboring genes encode similar proteins (WU-BLASTP E-value < 1E-10) and had no more than 2 intervening genes, only the longest gene model of the two or more similar, neighboring, genes was retained as a representative of the duplication.
- 3) Gene models whose best hit to the other proteome had a C-score (see below) less than 0.8 were removed.
- 4) Gene models with more than 10 hits (E-value < 1E-10) to the other proteome were removed because large gene families can seed false syntenic blocks in many different genomic locations.

5) The remaining gene models were ordered along chromosomes (or scaffolds in the case of the *Volvox* assembly). The chromosomes/scaffolds in Fig. S5 were arranged in decreasing order of the numbers of gene models contained. In multiple iterations, the gene models were used to seed syntenic blocks (defined as containing two or more genes with conserved gene order) in each genome with different numbers of intervening genes in the range zero to ten being picked in each iteration (data from zero to four intervening genes are shown in Table S4).

6) As the number of intervening genes allowed between two genes in a syntenic block increases, so does the chance of finding such blocks by chance. In order to establish a “null” model for each condition the order of the filtered genes was scrambled and the number of syntenic blocks formed with different number of intervening genes was determined (Table S4).

The number of genes remaining in syntenic blocks after this filtering process is shown in Table S3. A comparison of the synteny dotplots of *Volvox* vs. *Chlamydomonas* (Fig. S5A) and human vs. chicken (Fig. S5B) shows that the human-chicken genes tend to lie on longer (up to whole chromosome arm) syntenic segments than in the two algae. Furthermore, the syntenic blocks that are present in the algae are broken up by micro-inversions to a greater extent. Overall, there has been less overall rearrangement in vertebrates (Fig. S5B) than in *Volvox-Chlamydomonas* Fig. S5A.

Where whole genome duplication (WGD) has taken place, it is visible in plots of this type as repeated diagonal stretches in a row or column. There is no evidence of WGD in *Volvox*, *Chlamydomonas*, or their common ancestor (Fig. S5), unlike yeasts, higher plants and metazoans (S20) where WGDs have played a significant role in genome evolution.

## **E2. Definition of C-score**

We used the metric C-score as a measure of similarity between a protein from one predicted proteome and the proteins from a second predicted proteome. The C-score for protein X in one species and protein Y in a second species ( $C_{XY}$ ) is defined as the BLAST score of X against Y divided by the best BLAST score for protein X against all of the proteins in species Y. The C-score can be used to detect the presence of both orthologs (defined as mutual best BLAST hits) as well as potential paralogs. If X and Y are mutual best hits, then  $C_{XY}$  and  $C_{YX}$  will both equal 1. Recent paralogs of X will have a C-score of slightly less than 1 relative to Y; similarly, recent paralogs of Y will have a C-score of slightly less than 1 relative to X.

## **F. Loss of synteny through genomic rearrangements**

To quantify the amount of rearrangement on the gene by gene scale, we used the following metric: we calculated the fraction of all pairs of neighboring syntenic

orthologs from each set of two genomes (ascertained in the previous section) that were not adjacent to each other in the other genome in the pair, reasoning that this would have been caused by a rearrangement since the two genomes diverged (Table S2).

### **G. cDNA library construction and EST sequencing**

We extracted total RNA from *Volvox carteri f. nagariensis* female strains Eve and Eve10 and male strain 69-1b. For Eve and 69-1b, we extracted RNA from samples 1.5, 10, 24, 48 hours after sexual-induction and pooled the samples. For Eve10, we extracted RNA from 2-4 and 32-128 cell stages and pooled the samples. Poly A<sup>+</sup> RNA was isolated from total RNA using the Absolutely mRNA Purification kit and manufacturer's instructions (Stratagene, La Jolla, CA). cDNA synthesis and cloning used a modified procedure based on the "SuperScript plasmid system with Gateway technology for cDNA synthesis and cloning" (Invitrogen, Carlsbad, CA). 1-2 µg of poly A<sup>+</sup> RNA, SuperScript II reverse transcriptase (Invitrogen) and oligo dT-*NotI* primer (5' GACTAGTTCTAGATCGCGAGCGGCCGCCCT<sub>15</sub>VN 3', where V is any nucleotide except T and N is any nucleotide) were used to synthesize first strand cDNA. Second strand synthesis was performed with *E. coli* DNA polymerase I, DNA ligase, and RNaseH followed by end repair using T4 DNA polymerase. An adaptor including the overhanging pre-cut *SalI* site at the 5' end (5' TCGACCCACGCGTCCG 3' and 5' CGGACGCGTG 3') was ligated to the cDNA that was then digested with *NotI* (New England BioLabs, Ipswich, MA), and size selected by gel electrophoresis (1.1% agarose). The cDNA inserts were ligated into the *SalI* and *NotI* digested vector pCMVSPORT6 (Invitrogen). The ligation was transformed into ElectroMAX T1 DH10B cells (Invitrogen). In total, five cDNA libraries were constructed.

Library quality was assessed in two ways. First we ensured that the number of clones without inserts was less than 10% by randomly selecting 24 clones and PCR amplifying the cDNA inserts with the primers M13-F (5' GTAAAACGACGGCCAGT 3') and M13-R (5' AGGAAACAGCTATGACCAT 3'). Second, a test production run of a single 384-well plate was undertaken (as described below) and sequence quality, diversity and length were investigated. For the main production run, cells from each library were plated onto agarose plates (254 mm plates from Teknova, Hollister, CA) at a density of approximately 1,000 per plate. Plates were grown at 37°C for 18 hours then individual colonies were picked and each used to inoculate a well containing LB media with appropriate antibiotic in a 384 well plate (Nunc, Rochester, NY). Clones were grown in selective media in 384 well plates and plasmid DNA for sequencing was produced by rolling circle amplification (S21) (Templphi, GE Healthcare, Piscataway, NJ). Inserts were sequenced from both ends using primers complimentary to the flanking vector sequence with the following sequences: Fwd: 5' ATTTAGGTGACACTATAGAA and Rev: 5' TAATACGACTCACTATAGGG)

and Big Dye terminator chemistry on ABI 3730 DNA Analyzers (ABI, Foster City, CA). We generated pairs of reads (from both 5' and 3' ends of each cDNA clone), generating 42,240, 51,456 and 72,192 reads from Eve, Eve10 and 69-1b respectively, giving a grand total of 165,888 ESTs (Expressed Sequence Tags).

All 165,888 ESTs were processed through the JGI EST pipeline. Phred (S6, 22) was used to call bases and generate quality scores. Vector, linker, adapter, poly-A/T, and other artifact sequences were removed using the Cross\_match software (S6, 22) and an internally-developed short pattern finder. Low quality regions of the read were identified using internally-developed software, masking regions with a combined quality score of less than 15. The longest high quality region of each read was considered to be the sequence of the EST. ESTs shorter than 150 bp as well as those containing common contaminating sequences from e.g. *E. coli*, common vectors, and sequencing standards were removed from the data set. After these filtering steps, 132,038 ESTs were left (33,407, 37,354, and 61,277 from Eve, Eve10 and 69-1b respectively). An additional 2,510 ESTs were not included in the analysis of assembly completeness (see above) due to their having > 40% low complexity and repetitive sequence as determined by mdust (S23) run with the '-v 20' setting. This left 129,528 ESTs for consideration in analysis of assembly completeness.

Clustering the EST sequences involved first generating all-by-all pairwise alignments between the 132,038 filtered reads. ESTs sharing an alignment of at least 98% identity were then assigned to the same cluster. In addition, ESTs not sharing alignments but derived from opposite ends of the same cDNA clone were assigned to the same cluster. Clusters of ESTs were assembled into consensus sequences, contigs or singlets using CAP3 (S24). A total of 16,569 assembled consensus sequences were generated.

## H. Prediction of gene models

The 1,265 *Volvox* v.1 scaffolds were masked using RepeatMasker (<http://www.repeatmasker.org/>) and a library of 1,015 transposable elements (TEs), including manually curated *Volvox* and *Chlamydomonas* TEs (<http://www.girinst.org/>).

After masking, the JGI annotation pipeline was used to generate gene models. This pipeline employs gene prediction programs that are based on a variety of methods, as follows:

- 1) *ab initio* methods (FGENESH; <http://www.softberry.com/>);
- 2) homology-based methods (FGENESH+ and Genewise; <http://www.ebi.ac.uk/Wise2/>) seeded by Blastx alignments against sequences of nr, IPI (<http://www.ebi.ac.uk/IPI/>), and JGI *Chlamydomonas* annotation v3 (<http://www.jgi.doe.gov/chlamy/>);

3) cDNA-based methods (EST\_map; <http://www.softberry.com/>) seeded by 13,722 EST cluster consensus sequences derived from 87,866 *Volvox* ESTs. At the time the JGI annotation pipeline was run, 87,593 sequences had already been sequenced by the JGI (see above). The remaining 273 EST sequences were downloaded from the nr database at GenBank (S8);

4) synteny-based methods (FGENESH-2; <http://www.softberry.com/>) using the JGI *Chlamydomonas* assembly and annotation (<http://www.jgi.doe.gov/chlamy/>).

Genewise models were completed using scaffold data to find start and stop codons. EST clusters were used to extend, verify, and complete the predicted gene models. The resulting set of models was then filtered for the “best” models, based on criteria of completeness, length, EST support, and homology support, to produce a non-redundant representative set. This representative set was subject to protein functional analysis and manual curation, as described in the next sections.

The function of the translations of the predicted gene models was predicted using TMHMM (<http://www.cbs.dtu.dk/services/TMHMM/>), InterProScan (<http://www.ebi.ac.uk/interpro/>), and hardware-accelerated double-affine Smith-Waterman alignments ([http://www.timelogic.com/decypher\\_sw.html](http://www.timelogic.com/decypher_sw.html)) against SwissProt (<http://www.expasy.org/sprot/>), KEGG (<http://www.genome.jp/kegg/>), and KOG (<http://www.ncbi.nlm.nih.gov/COG/>). Finally, KEGG hits were used to map EC numbers (<http://www.expasy.org/enzyme/>), and Interpro and SwissProt hits were used to map GO terms (<http://www.geneontology.org/>).

We initially predicted 15,544 gene models in the genome of *Volvox*. 23% of these gene models were seeded by alignments of proteins in nr against the *Volvox* genome, while 67% were predicted *ab initio* and 10% were seeded using synteny with *Chlamydomonas reinhardtii* gene models (Table S5). Complete models with start and stop codons comprise 85% of the 15,544 initial gene predictions; 34% are consistent with ESTs and 70% align with proteins in Swissprot (<http://www.expasy.org/sprot/>) (Table S6).

The average *Volvox* gene is 5.27 kb long, the average gene density is 113 genes/Mb, and the average transcript has 7.78 exons (Table S7). The average protein length is 558 aa. We predicted that 4% of the proteins possess at least one transmembrane domain, 30% possess a signal peptide, and 2% possess both. We assigned 1,757 distinct GO terms to 4,566 proteins (30%), and we assigned 3,062 proteins (20%) to KEGG pathways, totaling 625 distinct EC numbers. We assigned 9,889 proteins (64%) to 3,145 distinct KOGs.

Knowing that the repeat masking was incomplete, as a last step, we filtered the initial set of 15,544 gene models, removing all those that encoded proteins with homology to transposable elements or were assigned TE-associated Pfam domains by InterProScan (S18). 1,103 protein models were removed from the set of 15,544, leaving 14,520 (Table S6).

Web-based editing tools available at the JGI genome portal were used to examine and improve predicted gene structures, and to record textual annotations and protein function. As of December 15, 2009, 1,628 genes (11%) have been manually curated. All annotations, both automatic and manual, may be viewed at a dedicated JGI portal (<http://www.jgi.doe.gov/volvox/>).

### **I. *Volvox* has longer introns than *Chlamydomonas***

The median intron size in *Volvox* is about twice that of *Chlamydomonas* (358 bp vs. 174 bp; Table 1, Fig. S6). (Mean length and S.D. in *Volvox* are 491 bp and 749 respectively, and 371 bp and 527 in *Chlamydomonas* respectively (Table S7)) This differential accounts for 10.5 Mb of the longer assembly in *Volvox*. 3.5Mb of the *Volvox* introns are made up of repeats, the composition of which reflects the overall repeat class composition of the genome (see above). The length of introns at conserved positions between orthologous exons in *Volvox* vs. *Chlamydomonas* divide into three subpopulations (Fig. S6), each of which has a mean that is significantly different from the others (Welch's t-test,  $p < 2.2E-16$ ). The majority (93%) orthologous introns are >100 bp long and show no size correlation between the two species (Pearson's  $r^2 = 0.0044$ ), though the mean length in *Volvox* (440 bp) is significantly longer than in *Chlamydomonas* (313 bp) (Welch's t-test,  $p < 2.2E-16$ ). A small (3%) subset of introns are short (~60-100 bp) in both species lie near the diagonal (although only weakly correlated, Pearson's correlation coefficient = 0.39) suggesting the existence of a common yet unknown selective mechanism. The third small subset of *Volvox* introns (4%) are around 60-100 bp long but have an uncorrelated length in *Chlamydomonas* (Pearson's  $r^2 = -0.0096$ ) and appear as a horizontal distribution across the bottom of the plot.

### **J. Pfam protein domain assignments**

To assign Pfam domains to proteins in a predicted proteome, we made a set of the longest protein sequence at each locus and ran the HMMPFAM module within InterProScan (S18) with Pfam v20 on these sequences. This algorithm assigns Pfam domains based on the gathering threshold specific to each HMM rather than using the same E-value for every domain.

### **K. Pfam domain combinations unique to *Chlamydomonadales***

The last common ancestor of *Volvox* and *Chlamydomonas* is represented by the clade *Chlamydomonadales* (taxonomy ID 3042) in the NCBI taxonomy (S8). To compare the protein domains found in species inside this clade to those found

outside, we took our Pfam annotations in *Volvox* and *Chlamydomonas* (see above) and added all Pfam domain annotations in Uniprot (<ftp://ftp.pir.georgetown.edu/databases/iproclass/>; release date 9/3/08) from all other species that are descended from the Chlamydomonadales node.

To date, no protein domains unique to the Chlamydomonadales have been deposited in the Pfam database. 2,650 domains are found in species within and outside the Chlamydomonadales while 7,690 are only found in species outside this group.

#### **L. Pfam domain combinations specific to *Volvox* or specific to *Chlamydomonas* or both**

We counted the number of different pairwise domain combinations in various species (Table S9), considering only unique pairs of protein domain types, regardless of how many times any domain occurs in a protein. In a search for Pfam domain combinations that are present in the volvocine algae (the clade represented by descendants of the last common ancestor of *Volvox* and *Chlamydomonas*), but not in other species, we found only a single domain combination in *Volvox* or *Chlamydomonas* and not other species in uniprot (<ftp://ftp.pir.georgetown.edu/databases/iproclass/>; release date 9/3/08). After this analysis, the JGI released a genome portal for another species in Chlorophyta, *Chlorella* sp. NC64A ([http://genome.jgi-psf.org/ChlNC64A\\_1/ChlNC64A\\_1.home.html](http://genome.jgi-psf.org/ChlNC64A_1/ChlNC64A_1.home.html)). The domain combination is found in *Chlorella* too. From this, we conclude that there are no volvocine algae-specific domain combinations.

We also found 199 domain combinations that are present in *Volvox* but not *Chlamydomonas* or other species and, conversely, 122 that are present in *Chlamydomonas* but not *Volvox* or other species. The majority of the gene models in these two sets have no EST support across their lengths and are on short, poorly assembled scaffolds that often include only one WGS read's length of sequence at each end and an internal gap several kb in length, suggesting that the gene models may span more than one genetic locus. This suggests there are few Pfam domain combinations found in one alga and not the other.

#### **M. Construction of protein families**

We compared the reference set of 14,520 predicted proteins from *Volvox* and 14,516 predicted proteins from *Chlamydomonas* to each other and to proteins from twenty other organisms spread across the entire tree of life, including animals, plants, fungi, amoebae, chromalveolates and bacteria (Table S10). [In addition to these species, the recently-published predicted proteomes of two *Micromonas* species (S25) were used in the analysis of protein families specific to the Volvocine algae (see below)]. Protein comparisons were performed using WU-BLASTP 2.0MP-WashU [04-May-2006] (S10) with filtering from low-

complexity sequences and simple repeats and Smith-Waterman post-processing. (To determine the cutoff for protein family construction, we manually examined BLASTP alignments at different E-values. We found that a cutoff of E-value  $< 1E-10$  included proteins with distinct regions of homology compared to E-values  $\geq 1E-10$  that had scattered regions of similarity in the alignments that appeared to be present by chance.) Mutual best hits (E-value  $< 1E-10$ ) between a protein in *Volvox* and a protein in any of the 21 other species including *Chlamydomonas* (as well as mutual best hits between a protein in *Chlamydomonas* and a protein in any of the 21 other species including *Volvox*) were used to establish orthology. Paralogs were added according to empirically-determined criteria that include in-paralogs. In a final step, proteins that were not in families were pledged to a family if their best hit (E-value  $< 1E-20$ , coverage  $> 50\%$ ) was in a family, another good hit (E-value  $< 1E-20$ , coverage  $> 50\%$ ) was in the same family, and the family had 50 or fewer proteins in it before pledging. This E-value and coverage cutoffs were determined by choosing a few dozen families and comparing the range of E-values and coverages of proteins within families to those of proteins that had similarity, yet had not been included in the protein families, making them candidates for pledging.

There are 7,612 mutual best hit relationships between *Volvox* and *Chlamydomonas* proteins. These, together with 168 mutual best hits between another species and either *Volvox* or *Chlamydomonas* form the backbone of 7,780 families (with the latter 168 families lacking proteins from either *Volvox* or *Chlamydomonas*). After addition of paralogs 7,293 contain 9,311 (64%) *Volvox* proteins and 7,233 contain 9,189 (64%) *Chlamydomonas* proteins. We found that 3,683 families (containing 3,809 *Volvox* proteins) are also conserved in moss (5,765 proteins) and 3,204 families (containing 3,309 *Volvox* proteins) are also conserved in Arabidopsis (4,141 proteins).

Notably, 10 of these families have a single member in *Chlamydomonas* and more than five members in *Volvox* whereas only two families have a single *Volvox* member and more than five *Chlamydomonas* members (Table S11). There are only 80 families (1.1%) with over 5 proteins from *Chlamydomonas* and/or *Volvox*. 295 families contain a single *Volvox* protein and 2-5 *Chlamydomonas* proteins, while 282 families contain a single *Chlamydomonas* protein and 2-5 *Volvox* proteins.

## **N. *Volvox*-specific genes**

We were interested in identifying how many novel protein coding genes had appeared in the *Volvox* lineage since divergence from *Chlamydomonas*, since these proteins could encode *Volvox*-specific functions. From a starting set of 5,209 *Volvox* proteins that had not been placed into a protein family (see above), we identified 142 putative potentially *Volvox*-specific proteins based on the following three criteria: these proteins had no TBLASTN hit to the



*Chlamydomonas* genome assembly (E-value < 1E-10); at least one splice site supported by EST evidence and no BLASTP hit (E-value < 1E-10) to any protein from any of the proteomes we had used to make the protein families (Table S10 and see above).

We found 84 of the 142 proteins had BLASTP homology (E-value < 1E-10) to at least one other protein in the set, suggesting they are part of a protein family; the remaining 58 were singletons (Table S12). The quality of each of the 142 putative *Volvox*-specific gene models was inspected manually on the JGI genome browser at <http://www.jgi.doe.gov/volvox>. Many of these models were short and/or based solely on *ab initio* gene modelling and/or had no EST evidence or conflicted with EST evidence. Nonetheless, 25 gene models were completely consistent with EST evidence, and a further 11 gene models have partial EST support (Table S12). When we searched these 36 gene models against the protein sequences from the two *Micromonas* genomes (S25) using BLASTP (E-value < 1E-5) we found no detectable homology.

Intriguingly, none of the known *Volvox* developmental regulators was in this set of *Volvox*-specific proteins. Our analyses suggest that there are a small number of *Volvox*-specific proteins, despite substantial differences in developmental complexity between *Volvox* and *Chlamydomonas*.

### **O. *Chlamydomonas*-specific genes**

In a parallel analysis to that performed for *Volvox*-specific genes, we identified 757 putative *Chlamydomonas*-specific genes from a starting set of 5,327 proteins that we were not able to place in a protein family. The larger number of *Chlamydomonas*-specific proteins compared to the number of *Volvox*-specific proteins may in part be due to deeper EST coverage in *Chlamydomonas*.

We found 238 of the 757 proteins had BLASTP homology (E-value < 1E-10) to at least one other protein in the set, suggesting they belong to a *Chlamydomonas*-specific protein family; the remaining 519 were singletons (Table S13). We chose a random sample of 50 putative *Chlamydomonas*-specific gene models from each of the above classes and examined the gene models manually at <http://genome.jgi-psf.org/Chlre3/Chlre3.home.html> and hence estimate that 32% and 60% of the models respectively are completely consistent with EST data (Table S13). We extrapolate this analysis to suggest that *Chlamydomonas* may have up to 400 novel proteins.

### **P. Volvocine algae-specific protein families**

We investigated three classes of proteins that are only found in volvocine algae (defined as the group of organisms that includes *Volvox* and *Chlamydomonas*, as well as other species, such as *Gonium*, *Pandorina*, *Eudorina* and *Pleodorina* for which genome sequences are not yet available (Fig. S2) and see below). We

discuss the results in this section and the next two sections, where presence or absence of a protein was based on the protein families described above. The first class of proteins is those found in both *Volvox* and *Chlamydomonas* but not other organisms. The second class consists of proteins that are only found in *Volvox*, and the third class consists of proteins that are only found in *Chlamydomonas*. These last two classes of proteins (together with various changes in regulation) might be associated with specific developmental and ecological adaptations in each species (see below).

We found 1,835 volvocine-specific protein families out of the total of 7,780 (Fig. 2B). To perform this analysis, we included data from the genomes of two *Micromonas* species that have been published recently (S25). These prasinophytes are substantially less reduced than the related *Ostreococcus* species that we had used in constructing protein families. We re-examined the 2,018 volvocine-specific families from our protein families in the light of this new data. We compared all *Volvox* and *Chlamydomonas* proteins in these families to all proteins in the predicted proteomes of *Micromonas pusilla* CCMP1545 v2.0 (<http://genome.jgi-psf.org/MicpuC2/MicpuC2.home.html>) and *Micromonas pusilla* sp. Rcc299 v3.0 (<http://genome.jgi-psf.org/MicpuN3/MicpuN3.home.html>) using WU-BLASTP (S10) (E-value < 1E-10). We removed 183 families containing a *Volvox* and/or *Chlamydomonas* protein that had a mutual best blast hit to a *Micromonas* protein. This left 1,835 volvocine-specific families. (Fig. 2B,D). Although these families have not been extensively characterized, they are expected to function in processes that are specific to volvocine algae and indeed, they include families of extracellular matrix proteins that participate in formation of the cell wall and ECM (Fig. 3A, S8).

## Q. Analysis of Transcription Associated Proteins

Transcription associated proteins (TAPs) include transcription factors (TFs, proteins that bind to *cis*-regulatory elements enhancing or repressing gene transcription) and transcriptional regulators (TRs, proteins with indirect regulatory functions, such as the assembly of the RNA polymerase II complex, functioning as scaffold proteins in enhancer/repressor complexes or controlling chromatin structure by modifying histones or the DNA methylation).

To identify the TAPs in *Volvox* and *Chlamydomonas*, we combined three sets of TAP classification rules for plants, PlantTFDB (S26), PlnTFDB (S27) and PlanTAPDB (S28), and expanded them to yield a set of classification rules for 111 families. Conflicts between the initial three sources were manually evaluated and resolved based on an analysis of the scientific literature. The resulting set was then expanded by adding recently defined families or subfamilies from published sources. The rule set for each family consists of at least one entry defining a "should" rule, i.e. a mandatory domain for that particular family. Additional

entries may define further "should" or "should not" (forbidden) domains. All domains relevant for classifying the TAPs were represented by a full length, global (termed "ls") HMM. If available, the HMMs were retrieved directly from the 'PFAM\_ls' database (S29). For the remaining domains, HMMs were custom-made using multiple sequence alignments (MSAs) to identify the conserved domain(s) of interest. The MSAs used for creating the custom HMMs were downloaded from PInTFDB (S30). For domains not represented in this database, MSAs were created as follows. BLAST searches with a protein query containing the respective domain yielded homologous hits defined by having at least 30% sequence identity with the query over a minimum length of 80 amino acids. Those hits were aligned using MAFFT (S31) and manually curated using Jalview (S32). The conserved domain of interest was extracted and the HMM calculated with HMMER 2.0 (<http://hmmmer.janelia.org/>) using 'hmmbuild' with the default parameters to generate ls HMMs and subsequently 'hmmcalibrate' with the option '--seed 0' which sets the random starting seed to a constant value and hence obtains reproducible results during the calibration process.

Gathering cutoff (GA) values were defined for each custom HMM. The GA was set as the lowest score of a domain-containing protein (true positive) after a 'hmmpfam' search (using an E-value cutoff of  $1E-5$ ) against the full proteome sets of several different species and considering the alignments of all hits. In order to avoid sampling bias, only fully sequenced genomes were used in this study. For each organism, the complete set of proteins derived by conceptual translation of the nuclear gene models (using the filtered/selected model per locus) was combined with the proteins encoded by the respective mitochondrial and plastid genome, if available. All proteins can be unambiguously identified via their fasta id. We used a unique five letter code for each organism followed by "mt" (mitochondrial) or "pt" (plastid), if applicable, and the accession number of the gene model.

Using all proteins of the investigated organisms as query, 'hmmpfam' searches were performed against an HMM library containing all 129 domains necessary for the TAP classification. The GA was used during this procedure to minimize the number of false positive hits, with GA values either provided with the Pfam HMMs or defined as described above. The classification rules were subsequently applied to all proteins for which at least one significant domain hit was found. In cases where the domain composition of a protein matched more than one classification rule, the 'should' rule with the highest score determined the family into which the protein was categorized.

Highly similar domains which are often found in the same or overlapping regions of a protein were treated in similar fashion, i.e., the domain with the lowest E-value/highest score was used for the subsequent classification. This procedure was necessary for four sets of domains, namely i) Myb\_DNA-binding and G2-like\_Domain, ii) NF-YB, NF-YC and CCAAT-Dr1\_Domain, iii) PHD and Alfin-

like and iv) GATA and zf-Dof. In addition, a Boolean OR rule was applied to three families. In these cases one out of two domains was found to be necessary and sufficient for a protein to be classified into the corresponding family. This rule was applied to the bZIP, HD-Zip and GARP\_ARR-B families. Whenever the presence of a combination of domains led to more than one possible family classification, TF was favored over TR or PT (putative TAPs). This situation was encountered in 14 cases.

In *Volvox*, the proportion of all proteins that are transcription factors is 347/14,520; in *Chlamydomonas* it is 297/14,516 (Table S15). This proportion is not significantly higher ( $p=0.02831$ , one-tailed Fisher Exact test) in *Volvox* compared to *Chlamydomonas*. A scatter plot of the number of *Volvox* vs. *Chlamydomonas* proteins in each TAP family (Fig. S7) shows that most families lie on or near the diagonal, with the larger families showing slight over-representation of *Volvox* proteins.

## **R. Annotation of genes associated with developmental biological processes in *Volvox***

### **Membrane trafficking proteins**

We started with a set of SNARE and Rab GTPase proteins from *Chlamydomonas* (S14, 33) and searched for appropriate gene models in homologous regions in the *Volvox* genome using TBLASTN (E-value < 10). Reciprocal searches were conducted to identify the mutual best hit pairs between the two species. The NCBI nr protein database (S8) was also queried with each protein from *Volvox* to identify the best hit in another species such as human, Arabidopsis and yeast (S34) which were then used as the query protein in searches against the *Volvox* and *Chlamydomonas* genomes. Finally, to assign a family name to each protein, we performed phylogenetic analysis for Rab proteins (aligning proteins and building 1,000 bootstrap neighbor-joining trees using CLUSTAL X 1.82 (S35)) and Syp proteins (aligning proteins with CLUSTAL X 1.82 (S35) and MUSCLE (S36), and building 100 bootstrap maximum parsimony trees with PAUP\* 4.0 beta 10 (S37)) using *Volvox* and *Chlamydomonas* proteins and *Arabidopsis* and human homologs found by BLAST searches at the nr database at GenBank (S8).

### **Cell cycle proteins**

We started with a set of cell cycle proteins from *Chlamydomonas* (S38) and searched for homologs in *Volvox* using BLASTP and TBLASTN (E-value < 10). Reciprocal searches were conducted to identify mutual best hit pairs between the two species. The NCBI nr protein database (S8) was also queried with each predicted cell cycle protein from *Volvox* and *Chlamydomonas* to identify the best hit in another species, which was then used as the query protein in searches against the *Volvox* and *Chlamydomonas* genomes and predicted proteomes. This process was iterated until all significant BLAST hits between cell cycle proteins

and gene models in *Chlamydomonas* and *Volvox* had been identified. For each cell cycle gene model identified in *Volvox*, flanking genes were used to identify synteny with the putative orthologous model in *Chlamydomonas*. In all cases the synteny was in agreement with orthology assignments based on mutual best hits. In addition, an identical approach was used to identify *Volvox* and *Chlamydomonas* orthologs, this time starting with all *Volvox* proteins with PFAM or KOG domain assignments specific to cell cycle regulation.

### **Cytoskeletal proteins**

We searched the GenBank nr database (S8) for members of known cytoskeletal protein families (S39), and used sequences identified from *Arabidopsis* (or *Drosophila* when *Arabidopsis* hits were not found) as queries in TBLASTN searches (E-value < 0.01) against the *Volvox* and *Chlamydomonas* genome assemblies at the *Volvox* or *Chlamydomonas* genome portal at the JGI. We assumed proteins without a hit were not encoded in the algal genome. The best gene model from the hit results was chosen, based on E-value, EST evidence and homology to the other algal genome and generally gave best hit E-values < 1E-7 when queried back against GenBank by BLASTP. Each protein model obtained in this way was next used as query in a second TBLASTN (E-value < 1E-5) against both algal genomes to identify additional homologs. This process was repeated until all members of the family were identified. Orthology between *Volvox* and *Chlamydomonas* proteins was inferred when the candidates were mutual best hits in TBLASTN searches and the Vista track at the JGI browser showed significant conservation at the DNA level.

### **Cell wall and extracellular matrix proteins**

We started with a set of known extracellular proteins/ECM proteins /cell wall proteins from *Volvox* (S40, 41).

We made TBLASTN searches (E-value < 1E-7) with the protein sequences against both, the *Volvox* and *Chlamydomonas* genomes. All hits were searched reciprocally against the other algal genome, also using TBLASTN.

Whenever TBLASTN hits corresponded to an existing gene model, the model was used, or the model was edited or a new model was generated using the JGI portal.

### **Phylogenetic analyses**

The following describes the phylogenetic analyses used to generate the trees in Fig. 3. Homologous protein sequences were aligned with MUSCLE (S36). Poorly-aligning end regions were trimmed and the sequences were realigned. The process was repeated until no further improvements could be made. Positions with gaps were removed prior to construction of phylogenies. ProtTest (S42) was used to select the best model of protein evolution for each set of proteins. Maximum likelihood trees were constructed using PhyML 3.0 (S43, 44) under

the following parameters: 100 bootstrap replicates; four-category gamma distribution; proportion of variable sites estimated from the data.

## 2) SUPPORTING TEXT

### A. Volvocine algae as a model for the evolution of multicellularity

In addition to its strengths as a developmental-genetic model, *Volvox*, together with its relatives in the “volvocine lineage” (Fig. S2), provides an unrivalled opportunity to explore the details of a pathway by which multicellular organisms with differentiated cell types evolved from a unicellular ancestor – one of the most complex and interesting steps in the evolution of higher organisms (S45). Formation of a multicellular body of predictable shape and size has usually required the invention of novel morphogenetic mechanisms, while differentiation of two or more distinct cell types within such a body has required elaboration of novel spatial patterns of gene expression. This is likely true in *Volvox* too. Multicellularity has evolved not just once but repeatedly and independently in a highly diverse array of taxa (S46-48). However, in most cases the transition to multicellularity has occurred so long ago (more than 500 MYA in many cases (S47, 49, 50) that most details of the molecular genetic changes leading to multicellularity have diverged so much they can no longer be studied.

It has long been suggested, however, that the volvocine algae provide an interesting exception to the preceding generalization. The volvocine lineage comprises several genera of green flagellates that can be arranged in a conceptual series according to increasing complexity (Fig. S2) – *Chlamydomonas*, *Gonium*, *Pandorina*, *Eudorina*, *Pleodorina*, *Volvox* – within which there are progressive increases in cell number, size of adult organisms, volume of ECM per cell, and the tendency to produce sterile, terminally differentiated somatic cells. Recent molecular-phylogenetic analyses not only indicate that these algae constitute a coherent, monophyletic group that began its radiation within the last ~200 MYA (S51) (S52), but also that the sequence indicated above serves as a reasonable first approximation of the historical sequence in which members of the group evolved (S53). Furthermore the allure of volvocine algae as an evolutionary model system is significantly enhanced by the finding that the kind of germ-soma division of labor that has traditionally earned an alga membership in the genus *Volvox* has arisen independently on at least four separate branches of the volvocine family tree (S54)

Molecular-genetic studies of *Volvox* embryogenesis have already indicated that different aspects of the evolution of *Volvox* from a *Chlamydomonas*-like ancestor have involved qualitatively different amounts of genetic change. For example, the *glsA* gene (whose product is required for the asymmetric divisions that set apart the germ and somatic cell lineages of *Volvox* embryos) (S55) obviously was adopted for this novel function with no significant changes, because the orthologous *GAR1* gene of *Chlamydomonas* is fully capable of substituting for it (S56), even though there is no known asymmetric division in the *Chlamydomonas* life cycle. Similarly, the *invA* gene (whose product is a kinesin

that the *Volvox* embryo requires for inversion at the end of embryogenesis) can be replaced by its *Chlamydomonas* ortholog, *IAR1* (S57), indicating that this gene was also adopted to play an entirely novel morphogenetic role without any significant evolutionary modification of the protein that it encodes. In marked contrast, *Chlamydomonas* lacks any recognizable ortholog of the *regA* gene of *Volvox* that plays a central role in differentiation and programmed death of somatic cells (apparently by repressing chloroplast biogenesis; (S58) (S59)): *regA* encodes an entirely novel combination of pre-existing and new protein domains, of which only the sequence of the presumed DNA-binding domain can be traced back to its Chlamydomonad ancestry (S60).

The attractiveness of *Volvox* as a developmental and evolutionary model is enhanced by the availability of several important molecular tools, including a variety of selectable markers (S61-64), a transposon-tagging system (S65, 66), a nuclear transformation system (S67), and a reporter gene (S68).

## **B. The *Volvox* vegetative life cycle**

*Volvox* has two cell types: ~2,000 small, biflagellate *Chlamydomonas*-like somatic cells that are embedded in the surface of a transparent sphere of glycoprotein-rich extracellular matrix (ECM), and ~16 large reproductive cells (termed gonidia) that lie just below the somatic cell monolayer (S69). Each gonidium grows, divides and undergoes morphogenesis to produce the next generation (Fig. S1B). Asymmetric cell divisions during embryogenesis determine the germ-line precursors. Following cleavage, the embryo turns inside-out in a process called inversion; inverted juveniles expand by the deposition of ECM, and finally hatch out of the mother colony to complete the life cycle.

## **C. The *Volvox* sexual cycle**

Sexual development in *Volvox* and *Chlamydomonas* is controlled by a large, multigenic, haploid mating locus (*MT*) that segregates as a single Mendelian trait. *MT* occupies the same chromosome in both species, but is five times larger in *Volvox* relative to *Chlamydomonas* (S70). Both sexes of *Volvox* have the same vegetative developmental cycle that is described in the preceding section. However, in response to a diffusible sex inducer protein *Volvox* males and females undergo modified developmental programs to produce sperm packets and eggs, respectively (S71). This developmental response to sex inducer involves changes in the timing of asymmetric cell division, altered gametic gene expression (S72, 73), and male germ cell divisions into sperm packets.

## **D. The *Volvox* ECM**

The *Volvox* ECM comprises up to 99% of the spheroid volume (reached in the adult shortly before release of daughter spheroids) and provides a highly organized substrate that compartmentalizes its interior space (Fig. S3). It is likely to be involved in intercellular signaling and nutrient transport (S40).



Evolutionarily, the *Volvox* ECM can be understood as a massive elaboration of the cell wall of *Chlamydomonas*. In both organisms the cell wall and ECM are composed of hydroxyproline-rich glycoproteins (HRGPs) that form rod-like structures and which often have additional globular domains at each end (S74). In *Volvox*, individual pherophorin subtypes are associated with distinct regions of the ECM, and each subtype is likely to be involved in the assembly and/or specific function of these ECM subdomains (also referred to as ECM subzones) (S74).

### **E. Environmental adaptations of *Volvox* and *Chlamydomonas***

*Volvox* and *Chlamydomonas* are cosmopolitan species and occupy overlapping habitats (S75). *Chlamydomonas* can proliferate in more transient bodies of water than *Volvox*, thanks to its faster generation time and smaller size. While *Chlamydomonas* is often portrayed as a soil alga, it is usually collected from soil in the form of environmentally resistant and dormant zygospores which can travel long distances and last for years under unfavorable conditions (S75, 76). Thus, the places where *Chlamydomonas* is collected provide only a partial indication of the environment to which it was adapted and in which it proliferates. On the other hand, *Volvox* and other multicellular volvocine algae are generally collected as live specimens from permanent or semi-permanent bodies of water; but such collection sites are biased against transient and unreliable locations. Thus, the specific environmental adaptations that may have arisen in the two species have not been systematically examined.

### 3) SUPPLEMENTAL FIGURES

**Fig. S1: *Volvox* phylogeny, morphology and development.**

(A) The phylogenetic position of *Volvox* and *Chlamydomonas* (within Chlorophyceae, green) is shown in an unrooted schematic cladogram of the eukaryotic tree of life (Sfrom 47); open and filled triangles denote clades consisting of solely unicellular lineages, and clades comprising both unicellular and multicellular lineages, respectively. (B) The asexual life cycle of *Volvox* with photomicrographs, taken as described in (S66), of a newly-hatched adult (top left, bar = 200  $\mu\text{m}$ ) and of an adult *Volvox* (lower right, bar = 500 $\mu\text{m}$ ) as well as scanning electron micrographs of an embryo after the first asymmetric cell division at cleavage cycle 6 (top right inset) and of a post-cleavage embryo during inversion (middle right inset). Each micrograph is placed near its corresponding developmental stage in the schematic diagram.

Fig. S1

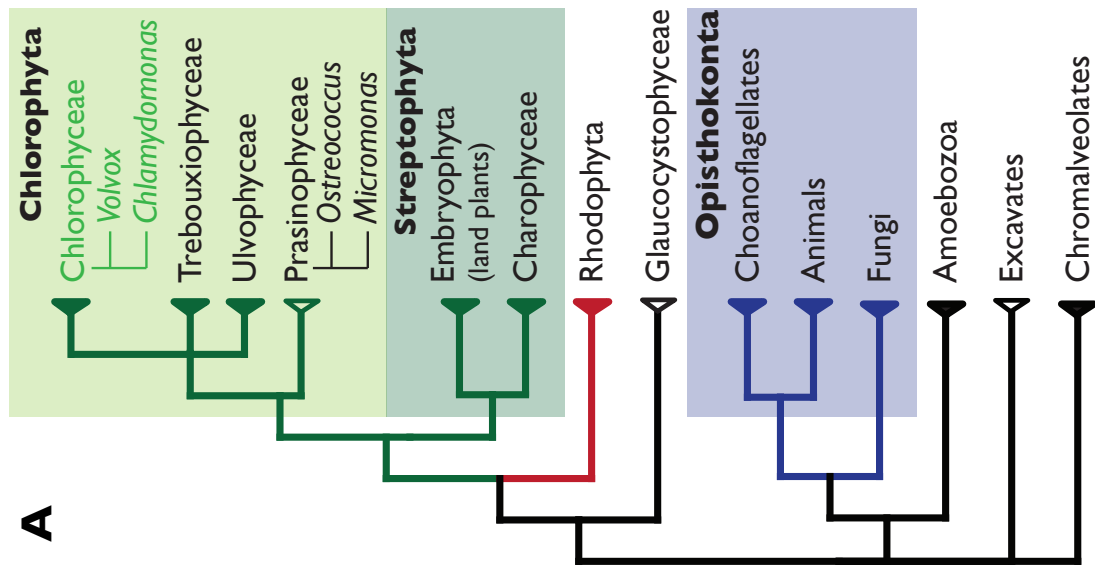

**B**

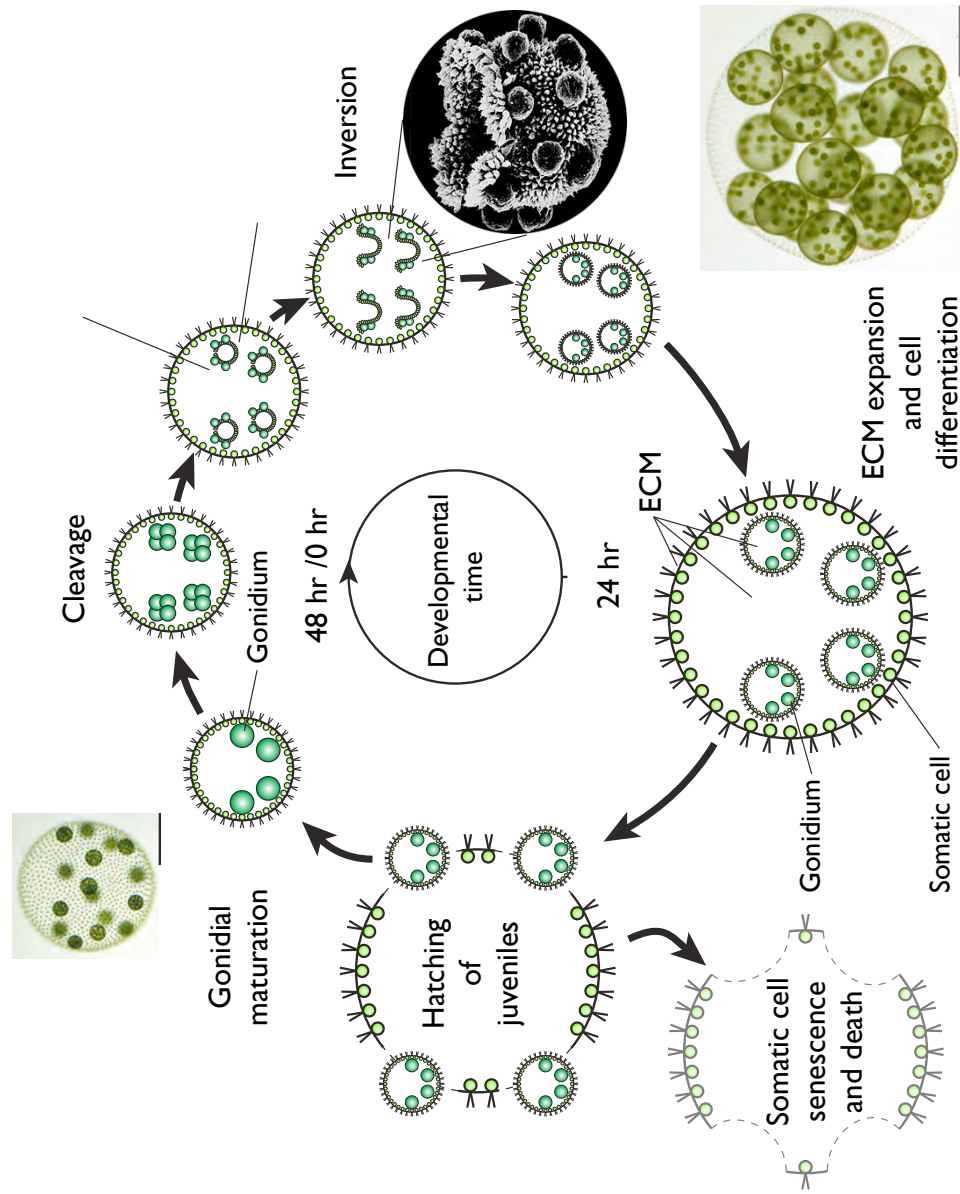

**Fig. S2: The algae of the volvocine lineage**

The volvocine algae comprise dozens of species that range in complexity from *Chlamydomonas* through colonial forms that have evolved different types of developmental traits. Photomicrographs of representative species from key genera are arranged along the top of the chart. The presence of the developmental traits listed along the left side is indicated in the grid by a 'X'. The photomicrographs were taken as described in (S66). Strains used are as follows: *Chlamydomonas reinhardtii* strain c-239+ (S77); *Gonium pectorale* strain kaneko3 (S78); *Pandorina morum* strain NIES-877; *Eudorina elegans* strain NIES-721; *Pleodorina starii* (female) (S79)

Fig. S2

| Developmental trait(s)                                                                     | <i>Chlamydomonas reinhardtii</i> | <i>Gonium pectorale</i> | <i>Pandorina morum</i> | <i>Eudorina elegans</i> | <i>Pleodorina starrii</i> | <i>Volvox carteri</i> |
|--------------------------------------------------------------------------------------------|----------------------------------|-------------------------|------------------------|-------------------------|---------------------------|-----------------------|
| Unicellular                                                                                | X                                |                         |                        |                         |                           |                       |
| Cell sheets<br>Partial inversion                                                           |                                  | X                       |                        |                         |                           |                       |
| Spherical colonies<br>Full inversion<br>Incomplete cytokinesis                             |                                  |                         | X                      | X                       | X                         | X                     |
| Expansion of ECM                                                                           |                                  |                         |                        | X                       | X                         | X                     |
| Anisogamy                                                                                  |                                  |                         |                        | X                       | X                         | X                     |
| Partial division of labor                                                                  |                                  |                         |                        |                         | X                         |                       |
| Complete division of labor<br>Asymmetric cell division<br>Bifurcated cell division program |                                  |                         |                        |                         |                           | X                     |

**Fig. S3: Schematic diagram of ECM in *Volvox***

In this schematic cross-section of a *Volvox* adult (redrawn from (S71, 75, 80)), the elaboration of the ECM into deep, cellular and boundary and flagellar zones is shown, with the three subzones of the cellular and boundary zones surrounding a single zoomed in somatic cell. Fibrous cellular zone 1 is attached to the somatic cell body plasmalemma, cellular zone 2 is relatively amorphous; fibrous cellular zone 3 forms compartments around the somatic cells. The boundary zone is continuous except where interrupted by flagella, the dense fibrous boundary zones 1 and 3 flank the tripartite boundary zone 2. Deep zone 1 is a band of filaments and surrounds the amorphous deep zone 2 (S75).

Fig. S3

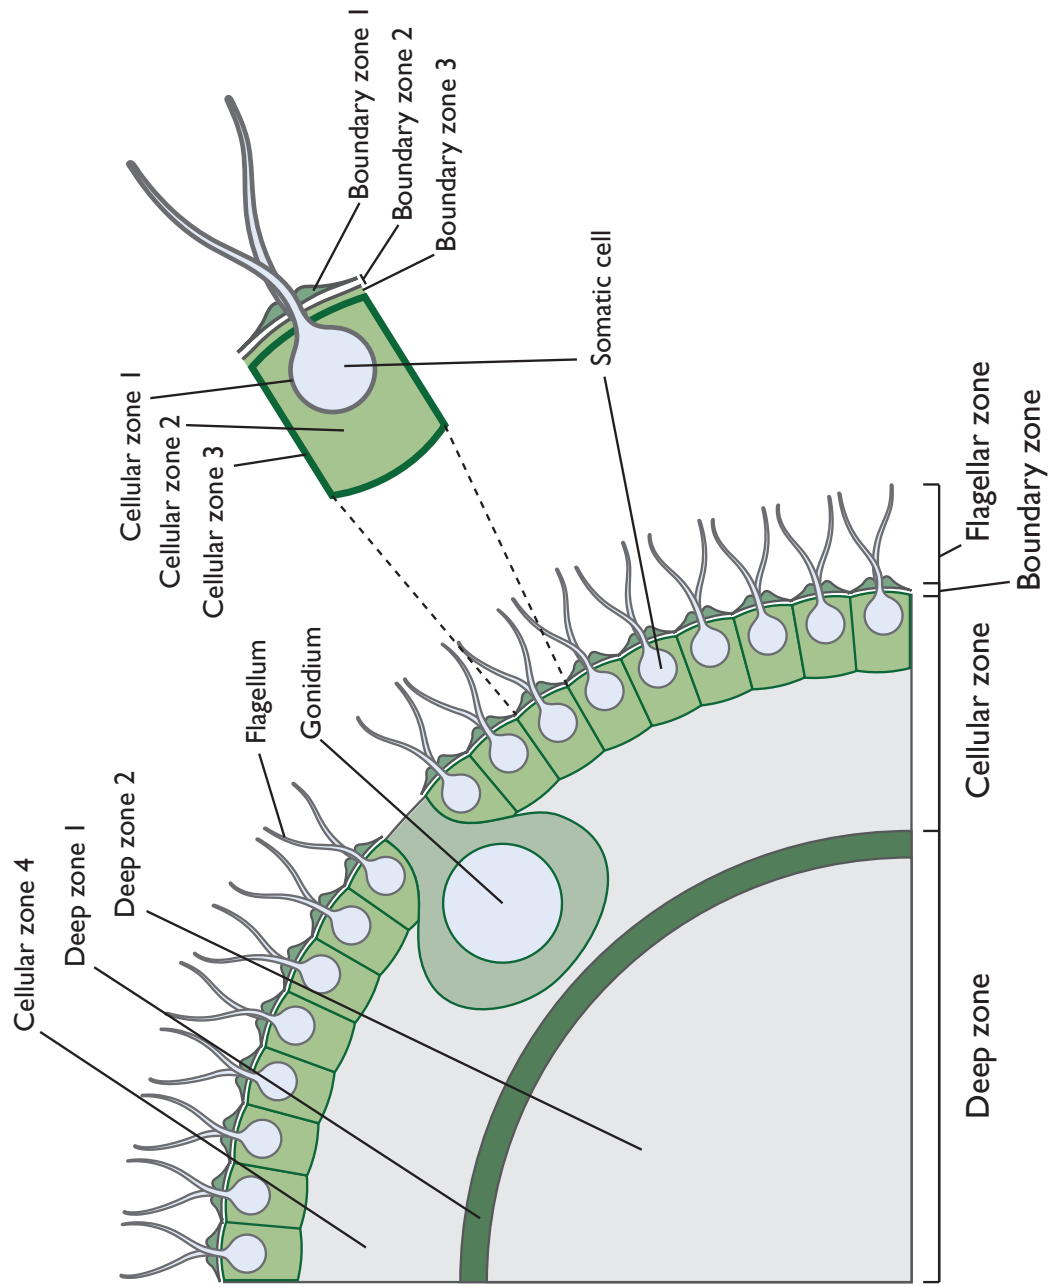

**Fig. S4: Histograms of Jukes-Cantor distance between repeats**

Histograms plot the distribution of sequence divergence (as measured by Jukes-Cantor distance) between repeats within *Volvox* (top row, A-C) and *Chlamydomonas* (bottom row, D-F). They show the distances between all repeats identified by Repeat Scout (A,D), Copia elements only (B,E) and Gypsy elements only (C,F).



Fig. S4

A

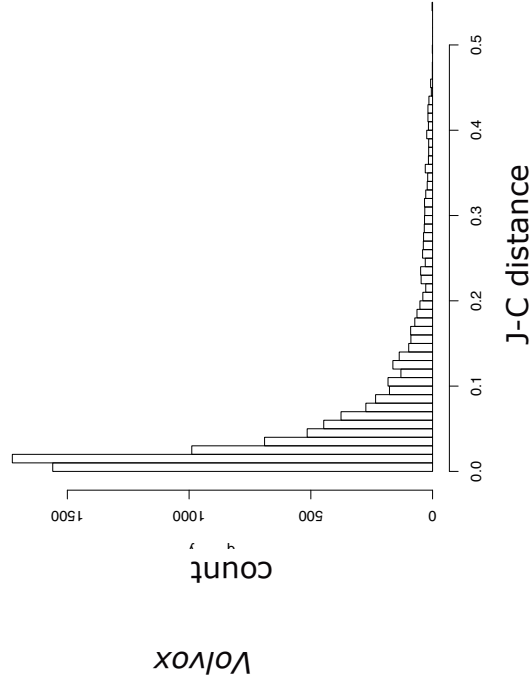

B

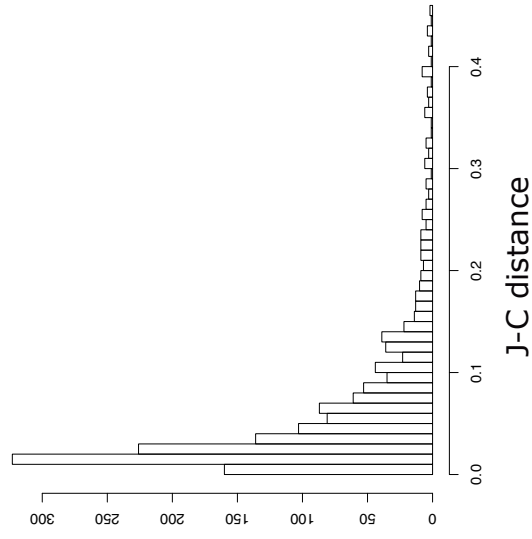

C

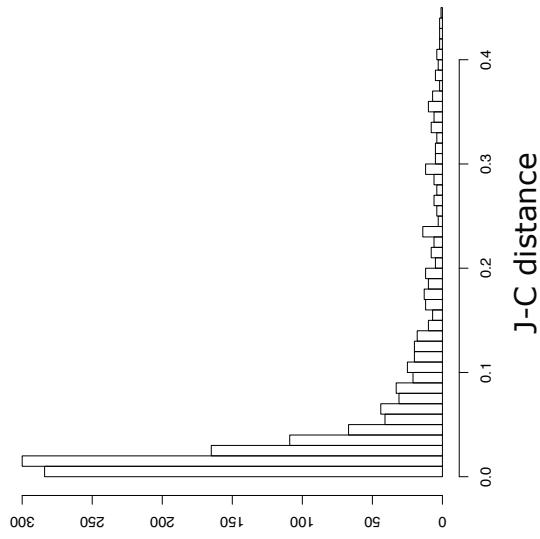

D

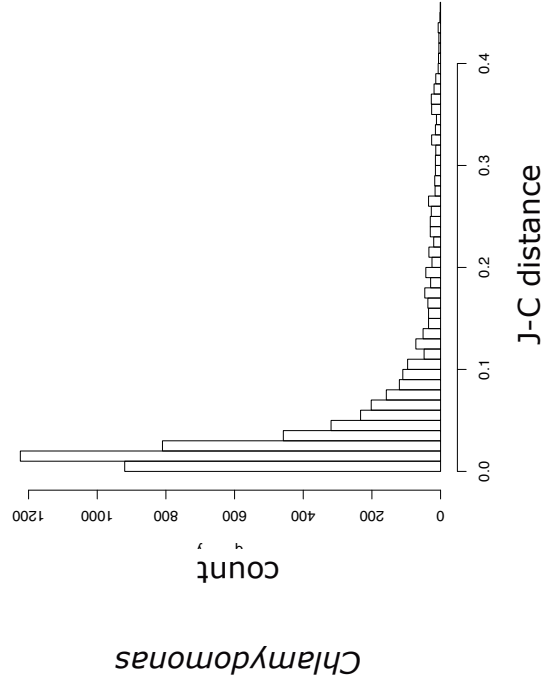

E

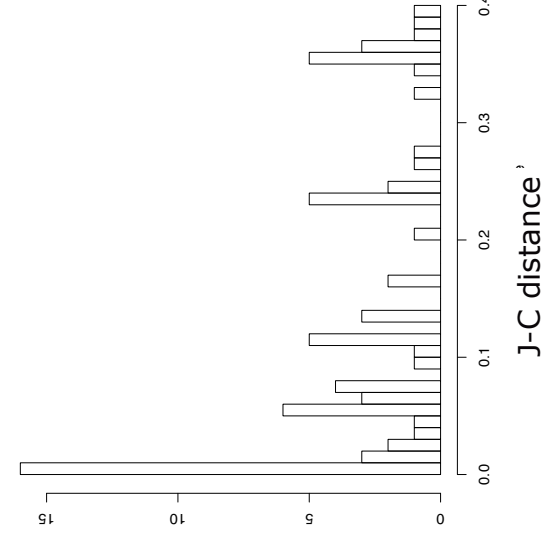

F

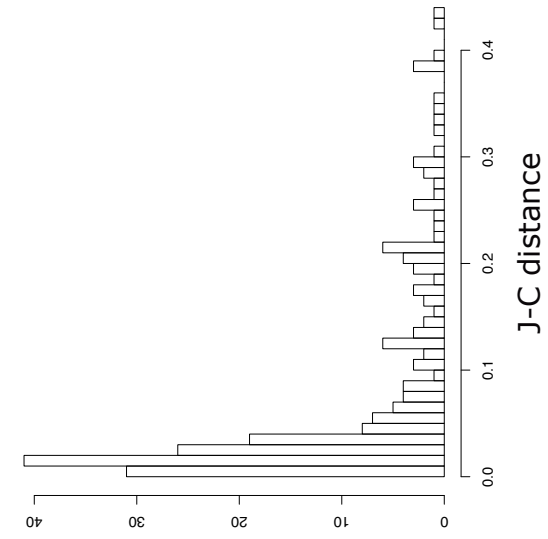

**Fig. S5: Synteny dotplot between *Volvox* and *Chlamydomonas* genomes**

Conserved gene order plots for (A) *Volvox-Chlamydomonas* and (B) human-chicken, showing locations of syntenic orthologs (max 2 intervening genes, segment size 2 or more genes). Syntenic genes lie along the two axes. These are arbitrarily numbered as follows: syntenically orthologs are numbered along scaffolds (*Volvox*) or chromosomes (*Chlamydomonas* v4 assembly, human and chicken) from largest to smallest, arbitrarily starting at 1 for the x-axes and 100,000 for the y-axes. unmap, chicken scaffolds that have not been mapped to a chromosome.

Fig. S5

A

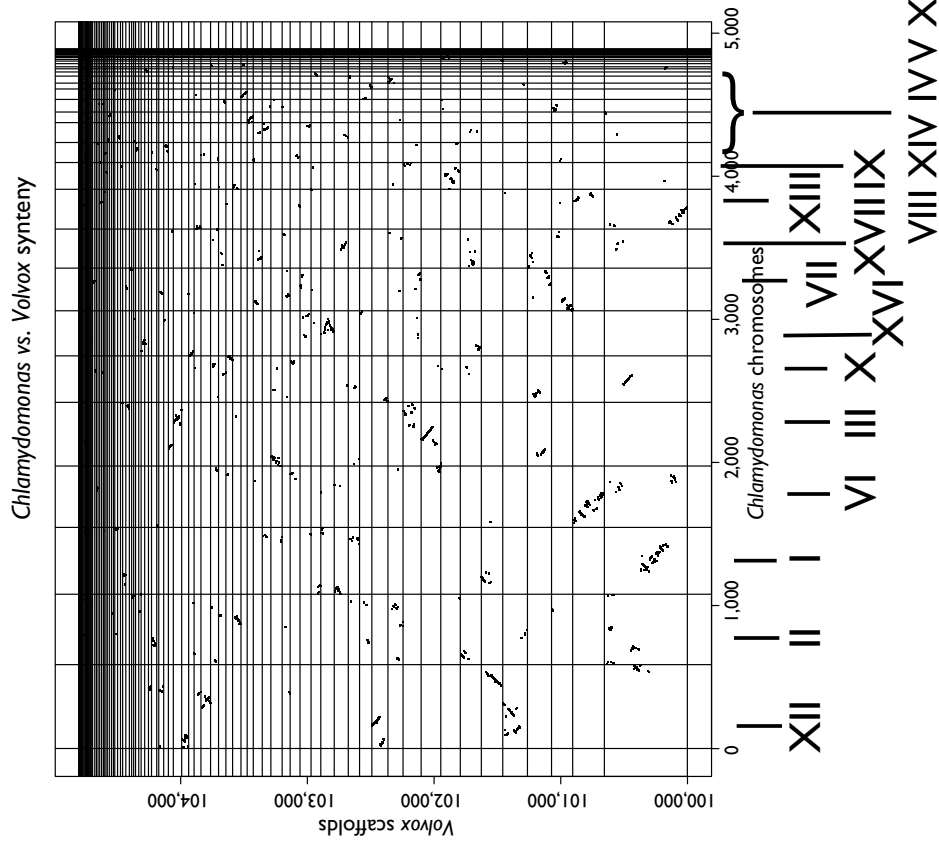

B

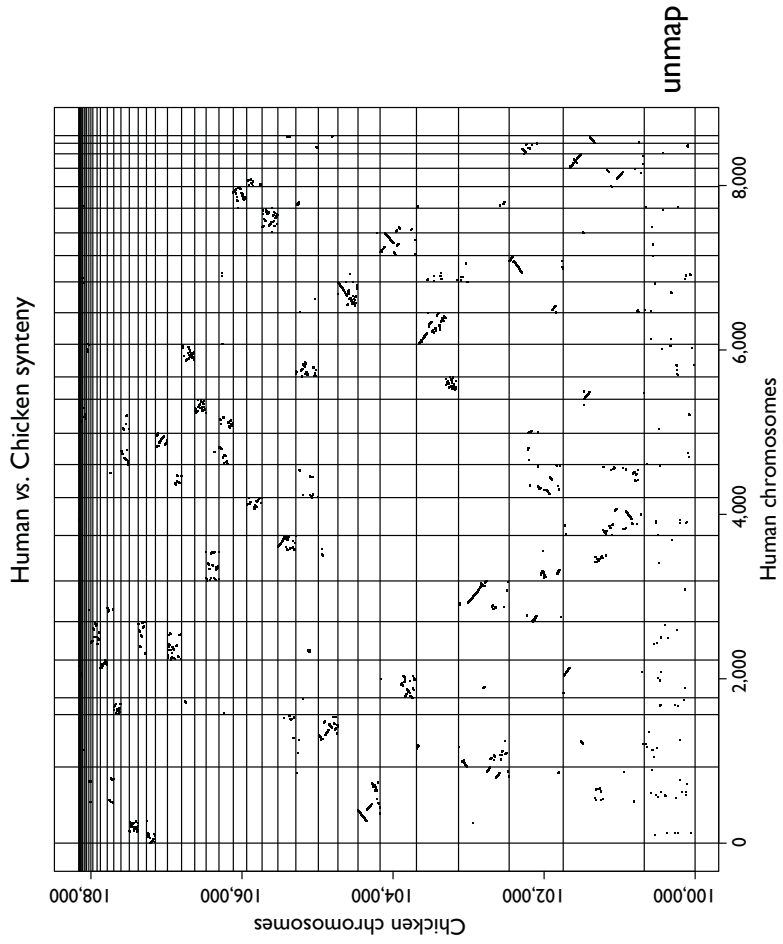

**Fig. S6: Intron lengths in *Volvox* and *Chlamydomonas***

The length of introns at conserved positions between orthologous exons in *Volvox* vs. *Chlamydomonas* is shown in a scatter plot (see above). Three subpopulations are evident (boxes). The majority (93%) orthologous introns are >100 nt long, longer in *Volvox* and show no size correlation between the two species. A small (3%) subset of introns are short ( $\leq 100$  nt) in both species and when plotted, lie near the diagonal meaning that they have similar sizes in the two species. Finally, a third small subset of *Volvox* introns (4%) are around 60-100 nt long but vary over a wide size range in *Chlamydomonas* and appear as a faint horizontal smear across the bottom of the plot.

Fig. S6

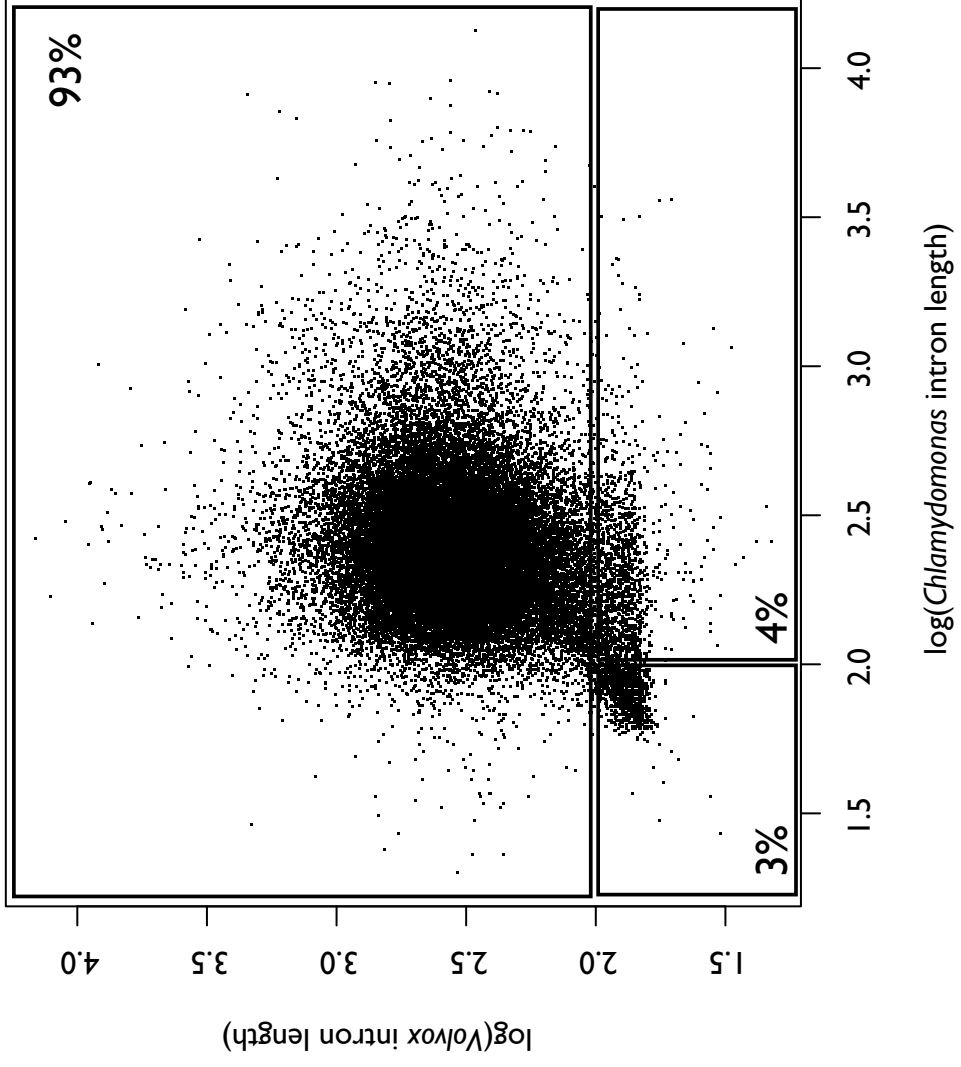

**Fig. S7: Scatter plot of family size in transcription associated proteins**

The number of *Volvox* proteins in a transcription-associated protein family is plotted against the number of *Chlamydomonas* proteins in the same family. The diagonal line marks the positions of families with equal numbers of proteins from each species. The names of families with more than five members from each species are indicated.

Fig. S7

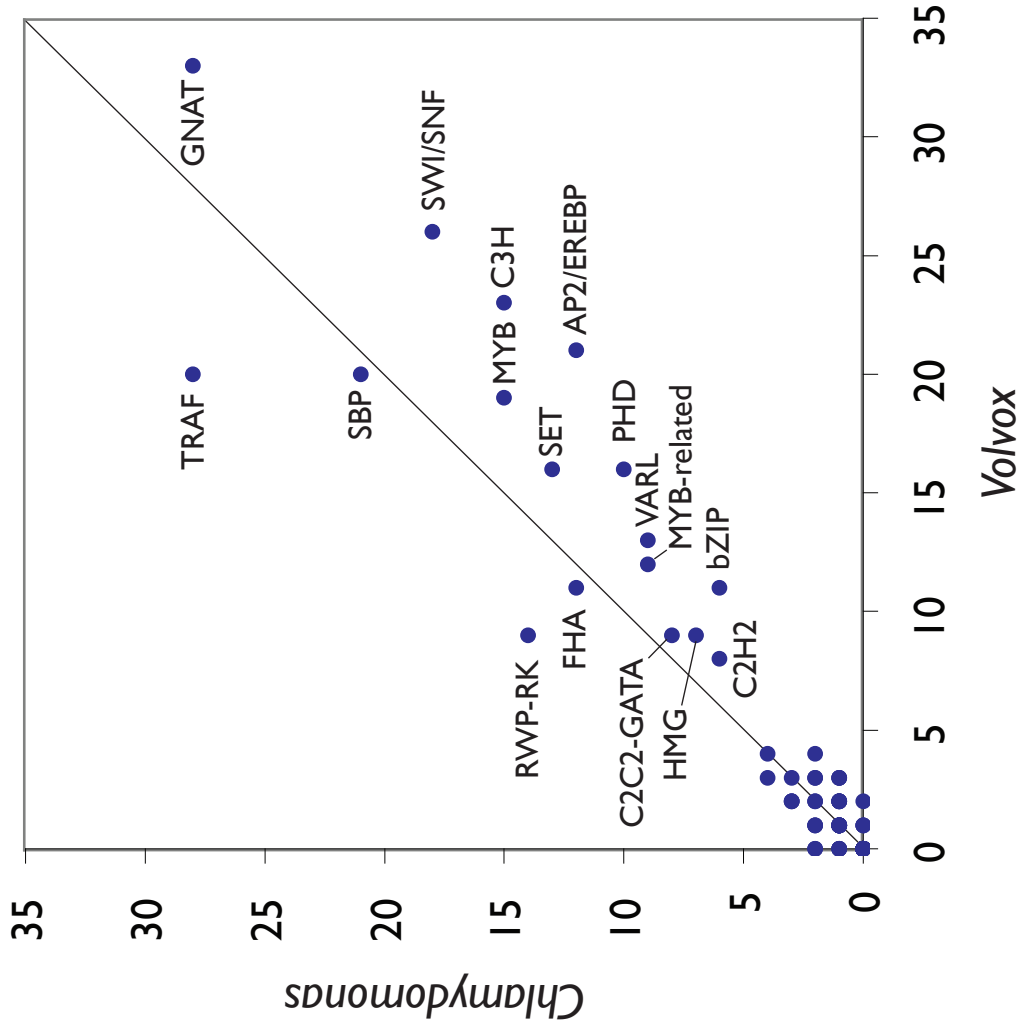

**Fig. S8: Diversification of *Volvox* matrix metalloprotease family.**

Unrooted maximum likelihood tree of *Volvox* matrix metalloproteases. Protein sequences are from *Volvox* (Vc; green) and *Chlamydomonas* (Cr; blue). Incomplete gene models were not included ; *Volvox*-specific clades with poorly-resolved branches are collapsed into triangles; bootstrap support  $\geq 50\%$  is indicated on branches. Red asterisks indicate proteins whose mRNA levels are up-regulated by sex inducer.



Fig. S8

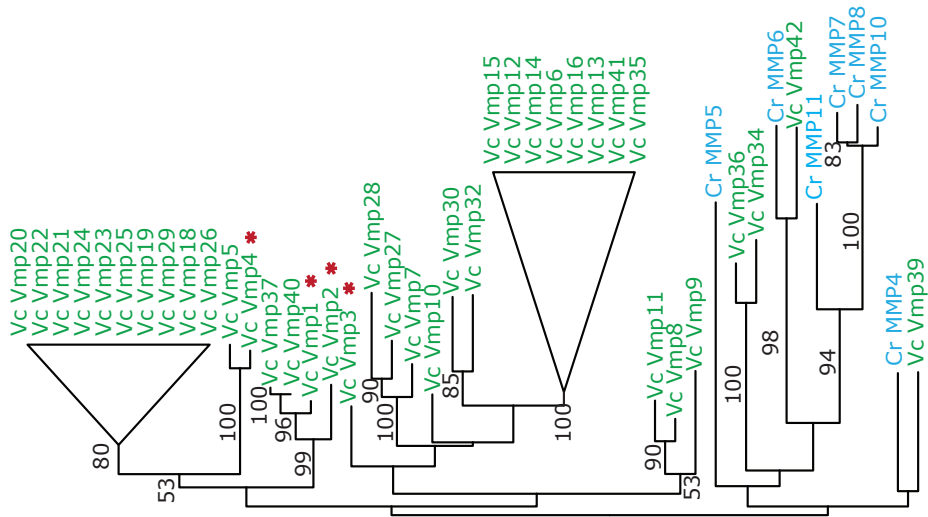

#### 4) SUPPLEMENTAL TABLES

**Table S1: Summary of repeats in *Volvox* and *Chlamydomonas* genomes**

The extent (and percentage in parentheses) of the *Volvox* and *Chlamydomonas* genomes that are masked by different classes of repeat family/subfamily and simple repeats are shown. Repeat masking was performed with RepeatMasker and the custom library that we had built for the genome.

| <b>Repeat family/subfamily</b>        | <b><i>Volvox</i> assembly</b> | <b><i>Chlamydomonas</i> assembly</b> |
|---------------------------------------|-------------------------------|--------------------------------------|
| SINEs                                 | 298,781 (0.22%)               | 125,738 (0.11%)                      |
| LINEs                                 | 2,681,727 (1.95%)             | 4,544,976 (3.84%)                    |
| LTR elements                          | 5,067,964 (3.68%)             | 890,315 (0.75%)                      |
| LTR/Copia                             | 218,136                       | 89,130                               |
| LTR/Gypsy                             | 675,620                       | 403,108                              |
| DNA elements                          | 1,861,025 (1.35%)             | 2,003,374 (1.69%)                    |
| Jordan                                | 152,065                       | 0                                    |
| Unclassified                          | 18,267,323 (13.25%)           | 7,206,766 (6.10%)                    |
| <b>Total Interspersed Repeats</b>     | <b>28,176,820 (20.44%)</b>    | <b>14,771,169 (12.50%)</b>           |
| Satellites                            | 145,736 (0.11%)               | 489,348 (0.41%)                      |
| Simple Repeats                        | 4,561,091 (3.31%)             | 6,184,379 (5.23%)                    |
| Low Complexity                        | 1,246,389 (0.90%)             | 1,799,865 (1.52%)                    |
| <b>Total non-Interspersed Repeats</b> | <b>5,953,216 (4.32%)</b>      | <b>8,473,592 (7.17%)</b>             |
| <b>Total Repeats</b>                  | <b>34,130,036 (24.76%)</b>    | <b>23,244,761 (19.66%)</b>           |

**Table S2: Genome evolution in green algae, animals, plants and diatoms**

We compare neutral nucleotide substitutions (4DTV), species divergence time, genome rearrangements and protein evolution (mutual best hits) for selected species pairs. N.D. not determined because at least three whole genome duplications since speciation prevented clear assignment of orthologs.

| Species pair                                 | Corrected 4DTV | Time since divergence (Myr) | Neighbor rearrangements (%) | Median distance between rearrangements in genome 1 / genome 2 (kb) | Similarity between mutual best BLAST hits (%) |
|----------------------------------------------|----------------|-----------------------------|-----------------------------|--------------------------------------------------------------------|-----------------------------------------------|
| <i>Volvox/Chlamydomonas</i> (green algae)    | 0.71           | ~ 220 (S51)                 | 34                          | 6 / 6                                                              | 73.8                                          |
| human/chicken (vertebrates)                  | 0.57           | ~310 (S81)                  | 15                          | 113 / 40                                                           | 75.9                                          |
| human/frog (vertebrates)                     | 0.80           | ~350 (S82)                  | 14                          | 83 / 49                                                            | 71.8                                          |
| <i>Arabidopsis/Populus</i> (angiosperms)     | 0.68           | ~110 (S83)                  | N.D.                        | N.D.                                                               | 72.0                                          |
| <i>Thalassiosira/Phaeodactylum</i> (diatoms) | 1.94           | ~90 (S84)                   | 45                          | 2 / 2                                                              | 54.9                                          |

**Table S3: Counts of filtered genes that were used to build syntenic blocks**

The numbers of genes in the table correspond to syntenic orthologs after tandem duplicates and high-copy gene were removed.

| Species              | Filtered genes |
|----------------------|----------------|
| Human                | 8,612          |
| Chicken              | 8,159          |
| Frog                 | 8,158          |
| <i>Chlamydomonas</i> | 4,890          |
| <i>Volvox</i>        | 4,804          |

**Table S4: Counts of *Volvox* and *Chlamydomonas* genes making up syntenic blocks with selected numbers of intervening genes allowed for real and scrambled gene order**

This table shows the number of syntenic orthologs that are part of syntenic blocks that were generated when a range of zero to four intervening genes were allowed between syntenic orthologs for both the real gene order, and randomized gene order.

| Maximum no. intervening genes | Real gene order | Scrambled gene order |
|-------------------------------|-----------------|----------------------|
| 0                             | 2,839           | 8                    |
| 1                             | 3,363           | 24                   |
| 2                             | 3,589           | 40                   |
| 3                             | 3,712           | 58                   |
| 4                             | 3,775           | 84                   |

**Table S5: Counts of gene models predicted in *Volvox* by initial automated annotation, classified by method**

The number of gene models that were generated with the automated JGI gene annotation pipeline are shown partitioned into the different methods that generated them. The gene models shown here are the raw output before genes with homology to Transposable Elements were filtered.

| Method used to generate gene model                      | Number of gene models |
|---------------------------------------------------------|-----------------------|
| Based on homology to proteins in nr database at GenBank | 3,645 (23%)           |
| <i>Ab initio</i> gene prediction                        | 10,217 (67%)          |
| Based on EST cluster consensus                          | 143 (1%)              |
| Based on synteny with <i>C. reinhardtii</i>             | 1,539 (10%)           |
| Total initial models                                    | 15,544 (100%)         |

**Table S6. EST and homology evidence supporting initial *Volvox* and *Chlamydomonas* gene models**

The numbers of gene models in the initial predictions that are complete from the start to the stop, have EST support or homology to a protein in Swissprot are shown. The models included in this table are those that were the output of the automated JGI annotation pipeline for *Volvox* and the frozen GeneCatalog (S14) that was submitted to GenBank (S8) (Accession ABCN00000000).

| Evidence                        | <i>Volvox</i> | <i>Chlamydomonas</i> |
|---------------------------------|---------------|----------------------|
| Complete models                 | 13,134 (85%)  | 8,919 (58%)          |
| Models with EST alignment       | 5,356 (34%)   | 7,894 (51%)          |
| Models with Swissprot alignment | 10,947 (70%)  | 10,760 (71%)         |

**Table S7: Gene structure statistics of *Volvox* and *Chlamydomonas* gene models**

A variety of statistics are shown for the set of *Volvox* gene models after removing those with homology to Transposable Elements and the manually-curated set of *Chlamydomonas* gene models that were submitted to GenBank (S8) (Accession ABCN01000000).

|                                          | <i>Volvox</i> | <i>Chlamydomonas</i> |
|------------------------------------------|---------------|----------------------|
| Protein-coding loci                      | 14,520        | 14,516               |
| Mean gene span (nt)                      | 5,269         | 4,375                |
| Total length of spliced transcripts (nt) | 27,126,224    | 23,675,605           |
| Mean transcript length (nt)              | 1,833         | 1,631                |
| Mean protein length (aa)                 | 568           | 454                  |
| Mean exon length (nt)                    | 194           | 232                  |
| Mean intron length (nt) <sup>1</sup>     | 491           | 371                  |
| Mean no. exons                           | 7.78          | 8.42                 |

<sup>1</sup> Introns less than 20 nt long are ignored

\* This is the set of gene models that was submitted to GenBank under the Accession ACJH00000000

**Table S8: Comparison of *Volvox* genome statistics to selected other genomes.**

| Group          | Species                          | Genome Size (Mb) | Number of chromosomes | %GC | Protein coding loci | % coding | % genes with introns | Introns per gene | Median intron length (bp) |
|----------------|----------------------------------|------------------|-----------------------|-----|---------------------|----------|----------------------|------------------|---------------------------|
| CHLOROPHYTA    | <i>Volvox carteri</i>            | 138              | 14*                   | 56  | 14,520              | 18.0     | 92                   | 7.05             | 358                       |
|                | <i>Chlamydomonas reinhardtii</i> | 118              | 17                    | 64  | 14,516              | 16.3     | 91                   | 7.4              | 174                       |
| STREPTOPHYTA   | <i>Physcomitrella patens</i>     | 480              | 27                    | 34  | 35,938              | 17.9     | 86                   | 3.9              | 205                       |
|                | <i>Arabidopsis thaliana</i>      | 140.1            | 5                     | 36  | 26,541              | 23.7     | 80                   | 4.4              | 55                        |
| OPISTHOKONTA   | <i>Homo sapiens</i>              | 2851             | 23                    | 41  | 23,328              | 1.2      | 83                   | 7.8              | 20,383                    |
|                | <i>Nematostella vectensis</i>    | 450              | 15                    | 40  | 27,273              | 6.0      | 68                   | 4.3              | 290                       |
|                | <i>Monosiga brevicollis</i>      | 42               | N.A.                  | 55  | 9,196               | 39.4     | 89                   | 6.6              | 135                       |
|                | <i>Neurospora crassa</i>         | 40               | 7                     | 54  | 10,107              | 36.4     | 80                   | 1.7              | 72                        |
| AMOEBOZOA      | <i>Dictyostelium discoideum</i>  | 34               | 6                     | 22  | 13,574              | 62.2     | 68                   | 1.3              | 236                       |
| CHROMALVEOLATA | <i>Thalassiosira pseudonana</i>  | 34.5             | 24                    | 47  | 11,390              | 49.4     | 60                   | 1.5              | 57                        |

\* see (S75)

N.A. not available

**Table S9: Pfam domain counts and combinations in *Volvox* and *Chlamydomonas* compared to selected other species**

|                                     | <i>Volvox</i> | <i>Chlamydomonas</i> | <i>Arabidopsis</i> | <i>Monosiga</i> | sea anemone | human  |
|-------------------------------------|---------------|----------------------|--------------------|-----------------|-------------|--------|
| Total number of domains in proteome | 10,318        | 10,168               | 38,887             | 11,786          | 30,535      | 42,057 |
| No. different PFAM domains          | 2,431         | 2,354                | 3,028              | 2,232           | 3,078       | 3,832  |
| No. different pairwise combinations | 1,392         | 1,219                | 1,838              | 2,128           | 2,723       | 4,038  |
| No. proteins with 1 domain          | 5,368         | 5,437                | 15,547             | 4,154           | 12,843      | 11,570 |
| No. proteins with 2 domain types    | 989           | 880                  | 3,639              | 1,157           | 2,456       | 3,543  |
| No. proteins > 2 domain types       | 287           | 267                  | 1,193              | 494             | 797         | 1,799  |

**Table S10: Complete predicted protein sets used to build protein families**

The genus and species, together with abbreviations used in e.g. Table S12 as well as their version and notes are shown for all proteomes used to make protein families (see above).

| Species name                                    | Abbreviation | Version and Notes                                                                                                                 |
|-------------------------------------------------|--------------|-----------------------------------------------------------------------------------------------------------------------------------|
| <i>Cyanidioschyzon merolae</i> 10D              | Cme          | release Apr 8, 2004; <a href="http://merolae.biol.s.u-tokyo.ac.jp/download">http://merolae.biol.s.u-tokyo.ac.jp/download</a>      |
| <i>Synechocystis</i> sp. PCC 6803               | Syn          | complete genome - 0..3573470 GenBank Accession NC_000911                                                                          |
| <i>Pseudomonas aeruginosa</i> PA01              | Pae          | complete genome - 0..6264403 GenBank Accession NC_002516                                                                          |
| <i>Staphylococcus aureus</i> subsp. aureus N315 | Sau          | complete genome - 0..2814816 GenBank Accession NC_002745                                                                          |
| <i>Dictyostelium discoideum</i>                 | Ddi          | dictyBase.org; Full Chromosomes made 10/05/2004; Primary Features made 7/11/2005                                                  |
| <i>Tetrahymena thermophila</i> SB210            | Tth          | <i>Tetrahymena</i> Genome Database (TIGR) Aug 2004                                                                                |
| <i>Phytophthora ramorum</i>                     | Pra          | JGI v.1 <a href="http://genome.jgi-psf.org/Phyra1_1/Phyra1_1.home.html">http://genome.jgi-psf.org/Phyra1_1/Phyra1_1.home.html</a> |
| <i>Phytophthora sojae</i>                       | Pso          | JGI v.1 <a href="http://genome.jgi-psf.org/sojae1/sojae1.home.html">http://genome.jgi-psf.org/sojae1/sojae1.home.html</a> sojae1  |

|                                             |     |                                                                                                                                                                                              |
|---------------------------------------------|-----|----------------------------------------------------------------------------------------------------------------------------------------------------------------------------------------------|
| <i>Neurospora crassa</i>                    | Ncr | <a href="http://fungal.genome.duke.edu">http://fungal.genome.duke.edu</a> , genome neurospora_crassa.20020212.nt.gz                                                                          |
| <i>Prochlorococcus marinus</i> str. MIT9313 | Pma | 2003 JGI/ORNL <a href="http://genome.jgi-psf.org/prom9/prom9.home.html">http://genome.jgi-psf.org/prom9/prom9.home.html</a>                                                                  |
| <i>Arabidopsis thaliana</i>                 | Ath | TAIR6, updated 11.2005 from NCBI <a href="ftp://ftp.ncbi.nih.gov/genomes/Arabidopsis_thaliana">ftp://ftp.ncbi.nih.gov/genomes/Arabidopsis_thaliana</a>                                       |
| <i>Homo sapiens</i>                         | Hsa | NCBI 36 from ensembl build 38                                                                                                                                                                |
| <i>Caenorhabditis elegans</i>               | Cel | WS 150 from ensembl build 38                                                                                                                                                                 |
| <i>Ostreococcus tauri</i>                   | Ota | JGI v2.0 <a href="http://genome.jgi-psf.org/Ostta4/Ostta4.home.html">http://genome.jgi-psf.org/Ostta4/Ostta4.home.html</a>                                                                   |
| <i>Ostreococcus lucimarinus</i>             | Olu | ( <i>O. pacifica</i> ; <i>Ostreococcus</i> CCE9901) JGI v. 2.0 <a href="http://genome.jgi-psf.org/Ost9901_3/Ost9901_3.home.html">http://genome.jgi-psf.org/Ost9901_3/Ost9901_3.home.html</a> |
| <i>Physcomitrella patens</i>                | Ppa | JGI v. 1 <a href="http://genome.jgi-psf.org/Phypa1_1/Phypa1_1.download.ftp.html">http://genome.jgi-psf.org/Phypa1_1/Phypa1_1.download.ftp.html</a>                                           |
| <i>Monosiga brevicollis</i>                 | Mbr | JGI v. 1 <a href="http://genome.jgi-psf.org/Monbr1/Monbr1.home.html">http://genome.jgi-psf.org/Monbr1/Monbr1.home.html</a>                                                                   |
| <i>Thalassiosira pseudonana</i>             | Tps | JGI v. 3.0 <a href="http://genome.jgi-psf.org/Thaps3/Thaps3.home.html">http://genome.jgi-psf.org/Thaps3/Thaps3.home.html</a>                                                                 |
| <i>Naegleria gruberi</i>                    | Ngr | JGI v.1 <a href="http://genome.jgi-psf.org/Naegr1/Naegr1.home.html">http://genome.jgi-psf.org/Naegr1/Naegr1.home.html</a>                                                                    |
| <i>Paramecium tetraurelia</i>               | Pte | peptides from macronuclear genome downloaded from Paramecium DB release date 28-MCH-2007                                                                                                     |
| <i>Chlamydomonas reinhardtii</i>            | Cre | JGI v.3.1 freeze for GenBank submission 9/13/2007 from <a href="http://genome.jgi-psf.org/Chlre4/Chlre4.download.ftp.html">http://genome.jgi-psf.org/Chlre4/Chlre4.download.ftp.html</a>     |
| <i>Volvox carteri</i>                       | Vca | JGI v1 freeze from <a href="http://genome.jgi-psf.org/Volca1/Volca1.download.ftp.html">http://genome.jgi-psf.org/Volca1/Volca1.download.ftp.html</a>                                         |



**Table S11: Protein family size distribution in *Volvox* and *Chlamydomonas***

The number of protein families containing 1, 2-5 or more than 5 proteins from *Chlamydomonas* (columns across) and *Volvox* (rows down) are shown.

|                                  | <i>Chlamydomonas</i> proteins in family |     |    |
|----------------------------------|-----------------------------------------|-----|----|
| <i>Volvox</i> proteins in family | 1                                       | 2-5 | >5 |
| 1                                | 5,423                                   | 295 | 2  |
| 2-5                              | 282                                     | 669 | 13 |
| >5                               | 10                                      | 19  | 33 |

**Table S12: *Volvox*-specific gene models with EST evidence**

Presence of EST support and its quality is shown as counts of putative *Volvox*-specific genes that either have homology to another putative *Volvox*-specific gene (left column) or do not have such homology (right column), suggesting that these proteins might belong to *Volvox*-specific families, or might represent singleton *Volvox*-specific proteins respectively.

| Does protein have a hit to another putative <i>Volvox</i> -specific protein? | yes | no |
|------------------------------------------------------------------------------|-----|----|
| Full-length EST support                                                      | 16  | 9  |
| EST support over part of the gene model                                      | 11  | 0  |
| Problem with EST support                                                     | 57  | 47 |
| Total                                                                        | 84  | 58 |

**Table S13: *Chlamydomonas*-specific gene models with EST support**

Presence of EST support and its quality is shown as fractions of a random sample of putative *Chlamydomonas*-specific genes that either have homology to another putative *Chlamydomonas*-specific gene (left column) or do not have such homology (right column), suggesting that these proteins might belong to *Chlamydomonas*-specific families, or might represent singleton *Chlamydomonas*-specific proteins respectively.

| Does protein have a hit to another putative <i>Chlamydomonas</i> -specific protein? | Yes  | No   |
|-------------------------------------------------------------------------------------|------|------|
| Consistent EST support                                                              | 32 % | 60 % |
| EST probably supports gene model                                                    | 30 % | 16 % |
| Problem with EST support                                                            | 38 % | 24%  |

**Table S14: Proteins involved in processes that are associated with increased developmental complexity in *Volvox* relative to *Chlamydomonas***

In the table, the names given are gene symbols, with synonyms given after a forward slash. Symbols of paralogs/co-orthologs are separated by semi-colons. The JGI protein ID and defline are given in the next two columns. The following columns show information for *Chlamydomonas* (co-)orthologs. Where there is no gene symbol and protein ID in a column, a homolog could not be found. The ID of the protein family the proteins belong to is shown after the *Chlamydomonas* defline and is followed by abbreviations of all the species that have a member in that protein family. If the protein does not belong to a family, this columns shows 'unclustered'. The abbreviations used are as follows: Cme, *Cyanidioschyzon merolae*; Syn, *Synechocystis* sp.; Pae, *Pseudomonas aeruginosa*; Sau, *Staphylococcus aureus*; Ddi, *Dictyostelium discoideum*; Tth, *Tetrahymena thermophila*; Pra, *Phytophthora ramorum*; Pso, *Phytophthora sojae*; Ncr, *Neurospora crassa*; Pma, *Prochlorococcus marinus*; Ath, *Arabidopsis thaliana*; Hsa, *Homo sapiens*; Cel, *Caenorhabditis elegans*; Ota, *Ostreococcus tauri*; Olu, *Ostreococcus lucimarinus*; Ppa, *Physcomitrella patens*; Mbr, *Monosiga brevicollis*; Tps, *Thalassiosira pseudonana*; Ngr, *Naegleria gruberi*; Pte, *Paramecium tetraurelia*; Cre, *Chlamydomonas reinhardtii*; Vca, *Volvox carteri*.





|                                           |        |                                                   |  |  |  |  |  |  |             |                    |                                                  |
|-------------------------------------------|--------|---------------------------------------------------|--|--|--|--|--|--|-------------|--------------------|--------------------------------------------------|
| pH1                                       | 85077  | extracellular matrix glycoprotein pterophorin-II  |  |  |  |  |  |  | 6574211     | Cre-Va             | unclustered                                      |
| pH11                                      | 83859  | extracellular matrix glycoprotein pterophorin-III |  |  |  |  |  |  | unclustered | unclustered        | unclustered                                      |
| pHS                                       | 104453 | extracellular matrix glycoprotein pterophorin-S   |  |  |  |  |  |  | unclustered | unclustered        | unclustered                                      |
| pD21                                      | 77905  | extracellular matrix glycoprotein pterophorin-D21 |  |  |  |  |  |  | unclustered | unclustered        | unclustered                                      |
| pD22                                      | 71388  | extracellular matrix glycoprotein pterophorin-D22 |  |  |  |  |  |  | unclustered | unclustered        | unclustered                                      |
| pD23                                      | 108351 | extracellular matrix glycoprotein pterophorin-D23 |  |  |  |  |  |  | unclustered | unclustered        | unclustered                                      |
| pD24                                      | 110102 | extracellular matrix glycoprotein pterophorin-D24 |  |  |  |  |  |  | unclustered | unclustered        | unclustered                                      |
| pD25                                      | 77335  | extracellular matrix glycoprotein pterophorin-D25 |  |  |  |  |  |  | unclustered | unclustered        | unclustered                                      |
| pD26                                      | 77338  | extracellular matrix glycoprotein pterophorin-D26 |  |  |  |  |  |  | unclustered | unclustered        | unclustered                                      |
| pD27                                      | 107455 | extracellular matrix glycoprotein pterophorin-D27 |  |  |  |  |  |  | unclustered | unclustered        | unclustered                                      |
| pD28                                      | 108791 | extracellular matrix glycoprotein pterophorin-D28 |  |  |  |  |  |  | unclustered | unclustered        | unclustered                                      |
| pD29                                      | 65112  | extracellular matrix glycoprotein pterophorin-D29 |  |  |  |  |  |  | unclustered | unclustered        | unclustered                                      |
| pD30                                      | 75691  | extracellular matrix glycoprotein pterophorin-D30 |  |  |  |  |  |  | unclustered | unclustered        | unclustered                                      |
| pD31                                      | 104451 | extracellular matrix glycoprotein pterophorin-D31 |  |  |  |  |  |  | unclustered | unclustered        | unclustered                                      |
| pD32                                      | 104452 | extracellular matrix glycoprotein pterophorin-D32 |  |  |  |  |  |  | unclustered | unclustered        | unclustered                                      |
| pD33                                      | 59555  | extracellular matrix glycoprotein pterophorin-D33 |  |  |  |  |  |  | 6577227     | Cre-Va             | unclustered                                      |
| pD34                                      | 177206 | extracellular matrix glycoprotein pterophorin-D34 |  |  |  |  |  |  | unclustered | unclustered        | unclustered                                      |
| pD35                                      | 80812  | extracellular matrix glycoprotein pterophorin-D35 |  |  |  |  |  |  | unclustered | unclustered        | unclustered                                      |
| pD36                                      | 80731  | extracellular matrix glycoprotein pterophorin-D36 |  |  |  |  |  |  | 6577227     | Cre-Va             | unclustered                                      |
| pD37                                      | 100178 | extracellular matrix glycoprotein pterophorin-D37 |  |  |  |  |  |  | unclustered | unclustered        | unclustered                                      |
| pD38                                      | 100178 | extracellular matrix glycoprotein pterophorin-D38 |  |  |  |  |  |  | 6574211     | Cre-Va             | unclustered                                      |
| pD39                                      | 80872  | extracellular matrix glycoprotein pterophorin-D39 |  |  |  |  |  |  | unclustered | unclustered        | unclustered                                      |
| pD40                                      | 83847  | extracellular matrix glycoprotein pterophorin-D40 |  |  |  |  |  |  | 6574211     | Cre-Va             | unclustered                                      |
| pD41                                      | 47640  | extracellular matrix glycoprotein pterophorin-D41 |  |  |  |  |  |  | 6574211     | Cre-Va             | unclustered                                      |
| pD42                                      | 94516  | extracellular matrix glycoprotein pterophorin-D42 |  |  |  |  |  |  | 6577227     | Cre-Va             | unclustered                                      |
| pD43                                      | 112208 | extracellular matrix glycoprotein pterophorin-D43 |  |  |  |  |  |  | unclustered | unclustered        | unclustered                                      |
| pD44                                      | 101351 | extracellular matrix glycoprotein pterophorin-D44 |  |  |  |  |  |  | unclustered | unclustered        | unclustered                                      |
| pD45                                      | 107546 | extracellular matrix glycoprotein pterophorin-D45 |  |  |  |  |  |  | 6577070     | Cre-Va             | unclustered                                      |
| pD46                                      | 67890  | extracellular matrix glycoprotein pterophorin-D46 |  |  |  |  |  |  | 6577070     | Cre-Va             | unclustered                                      |
| pD47                                      | 71438  | extracellular matrix glycoprotein pterophorin-D47 |  |  |  |  |  |  | 6576940     | Cre-Va             | unclustered                                      |
| pD48                                      | 67883  | extracellular matrix glycoprotein pterophorin-D48 |  |  |  |  |  |  | 6577070     | Cre-Va             | unclustered                                      |
| pD49                                      | 67897  | extracellular matrix glycoprotein pterophorin-D49 |  |  |  |  |  |  | 6577070     | Cre-Va             | unclustered                                      |
| pD50                                      | 104151 | extracellular matrix glycoprotein pterophorin-D50 |  |  |  |  |  |  | 6576285     | Cre-Va             | unclustered                                      |
| pD51                                      | 104390 | extracellular matrix glycoprotein pterophorin-D51 |  |  |  |  |  |  | 6571970     | Cre-Va             | unclustered                                      |
| pD52                                      | 95611  | extracellular matrix glycoprotein pterophorin-D52 |  |  |  |  |  |  | 6570639     | Ath Olu Ppa Cre Va | unclustered                                      |
| pD53                                      | 107649 | extracellular matrix glycoprotein pterophorin-D53 |  |  |  |  |  |  | unclustered | unclustered        | unclustered                                      |
| pD54                                      | 177252 | extracellular matrix glycoprotein pterophorin-D54 |  |  |  |  |  |  | 6574700     | Cre Va             | unclustered                                      |
| pD55                                      | 89832  | extracellular matrix glycoprotein pterophorin-D55 |  |  |  |  |  |  | 6577227     | Cre Va             | unclustered                                      |
| pD56                                      | 172712 | extracellular matrix glycoprotein pterophorin-D56 |  |  |  |  |  |  | unclustered | unclustered        | unclustered                                      |
| pD57                                      | 307730 | extracellular matrix glycoprotein pterophorin-D57 |  |  |  |  |  |  | 6574211     | Cre Va             | unclustered                                      |
| pD58                                      | 106281 | extracellular matrix glycoprotein pterophorin-D58 |  |  |  |  |  |  | 6577227     | Cre Va             | unclustered                                      |
| pD59                                      | 97824  | extracellular matrix glycoprotein pterophorin-D59 |  |  |  |  |  |  | 6525769     | Cre Va             | unclustered                                      |
| pD60                                      | 90414  | extracellular matrix glycoprotein pterophorin-D60 |  |  |  |  |  |  | 6574211     | Cre Va             | unclustered                                      |
| <b>Chlamydomonas Pterophorin homologs</b> |        |                                                   |  |  |  |  |  |  |             |                    |                                                  |
|                                           |        |                                                   |  |  |  |  |  |  | 196399      | Au9_Cre17.g712900  | cell wall protein pterophorin-C1                 |
|                                           |        |                                                   |  |  |  |  |  |  | 196402      | Au9_Cre19.g620600  | cell wall protein pterophorin-C2                 |
|                                           |        |                                                   |  |  |  |  |  |  | 196403      | Au9_Cre13.g594540  | cell wall protein pterophorin-C3                 |
|                                           |        |                                                   |  |  |  |  |  |  | 196404      | Au9_Cre15.g238650  | cell wall protein pterophorin-C4                 |
|                                           |        |                                                   |  |  |  |  |  |  | 196406      | Au9_Cre05.g238650  | cell wall protein pterophorin-C5                 |
|                                           |        |                                                   |  |  |  |  |  |  | 196407      | Au9_Cre17.g718100  | cell wall protein pterophorin-C6                 |
|                                           |        |                                                   |  |  |  |  |  |  | 195997      | 195997             | cell wall protein pterophorin-C7                 |
|                                           |        |                                                   |  |  |  |  |  |  | 196005      | Au9_Cre17.g717850  | cell wall protein pterophorin-C8                 |
|                                           |        |                                                   |  |  |  |  |  |  | 196020      | Au9_Cre06.g299150  | cell wall protein pterophorin-C9                 |
|                                           |        |                                                   |  |  |  |  |  |  | 196024      | Au9_Cre09.g404150  | cell wall protein pterophorin-C10                |
|                                           |        |                                                   |  |  |  |  |  |  | 196027      | Au9_Cre07.g4331100 | cell wall protein pterophorin-C11                |
|                                           |        |                                                   |  |  |  |  |  |  | 196028      | Au9_Cre11.g627600  | cell wall protein pterophorin-C12                |
|                                           |        |                                                   |  |  |  |  |  |  | 196029      | Au9_Cre15.g626658  | cell wall protein pterophorin-C13                |
|                                           |        |                                                   |  |  |  |  |  |  | 148333      | Au9_Cre09.g396100  | cell wall protein pterophorin-C14                |
|                                           |        |                                                   |  |  |  |  |  |  | 141291      | Au9_Cre02.g078800  | cell wall protein pterophorin-C15                |
|                                           |        |                                                   |  |  |  |  |  |  | 164137      | Au9_Cre05.g238850  | cell wall protein pterophorin-C16                |
|                                           |        |                                                   |  |  |  |  |  |  | 522381      | 522381             | cell wall protein pterophorin-C17                |
|                                           |        |                                                   |  |  |  |  |  |  | 189163      | Au9_Cre17.g695500  | cell wall protein pterophorin-C18                |
|                                           |        |                                                   |  |  |  |  |  |  | 196022      | Au9_Cre09.g382740  | cell wall protein pterophorin-C19                |
|                                           |        |                                                   |  |  |  |  |  |  | 94393       | Au9_Cre12.g696700  | cell wall protein pterophorin-C20                |
|                                           |        |                                                   |  |  |  |  |  |  | 94393       | 94393              | cell wall protein pterophorin-C21                |
|                                           |        |                                                   |  |  |  |  |  |  | 196019      | 196019             | cell wall protein pterophorin-C22                |
|                                           |        |                                                   |  |  |  |  |  |  | 196025      | 196025             | cell wall protein pterophorin-C23                |
|                                           |        |                                                   |  |  |  |  |  |  | 192908      | Au9_Cre11.g481600  | cell wall protein pterophorin-C24                |
|                                           |        |                                                   |  |  |  |  |  |  | 196328      | Au9_Cre11.g481750  | hydroxyproline-rich glycoprotein, stress-induced |
|                                           |        |                                                   |  |  |  |  |  |  | 192780      | Au9_Cre15.g780350  | hydroxyproline-rich glycoprotein, stress-induced |
|                                           |        |                                                   |  |  |  |  |  |  | unclustered | unclustered        | unclustered                                      |
| <b>Sex-inducer</b>                        |        |                                                   |  |  |  |  |  |  |             |                    |                                                  |
| sex1                                      | 82768  | sex-inducer, sex-inducing pheromone               |  |  |  |  |  |  | unclustered | unclustered        | unclustered                                      |



|      |        |                                             |      |        |        |                   |                                                                                                               |         |                                                                 |
|------|--------|---------------------------------------------|------|--------|--------|-------------------|---------------------------------------------------------------------------------------------------------------|---------|-----------------------------------------------------------------|
| wes1 | 127274 | wes1, kinase ortholog                       | WEE1 | 194589 | 194589 | Au9_Cre07.g355220 | CDK inhibitory kinase                                                                                         | 6575995 | Gm6.Ddl Pra Ncr Ath Hsa Olu Ppa Mbr Tps Ngr Cre Vca             |
| cks1 | 127315 | CKS1, kinase ortholog                       | CKS1 | 182779 | 182779 | Au9_Cre03.g180350 |                                                                                                               | 6574639 | Gm6.Tth Pra Ncr Ath Hsa Cel Olu Ppa Mbr Tps Ngr Ptk Cre Vca     |
| mat3 | 127376 | CKS1, homolog                               | MAT3 | 187248 | 187248 | Au9_Cre06.g255450 | retinoblastoma protein                                                                                        | 6574768 | Gm6.Ddl Pso Ath Hsa Cel Olu Ppa Mbr Tps Ngr Ptk Cre Vca         |
| e2f1 | 127383 | E2F transcription factor family homolog     | E2F1 | 206364 | 206364 |                   |                                                                                                               | 6577131 | Gm6.Tth Pra Pso Ath Hsa Cel Olu Ppa Mbr Tps Ngr Ptk Cre Vca     |
| dp1  | 121369 | putative DP transcription factor            | DP1  | 206363 | 206363 |                   | related to E2F and DP transcription factors, Chlamydomonas specific; transcription factor, E2F and DP-related | 6577455 | Gm6.Ddl Tth Pra Pso Ath Hsa Cel Olu Ppa Mbr Tps Ngr Ptk Cre Vca |
| e2f1 | 127270 | related to E2F and DP transcription factors | E2F1 | 168563 | 168563 | Au9_Cre13.g573000 |                                                                                                               |         | unclustered                                                     |

**Table S15: Predicted numbers of TAPs**

The number of proteins that were predicted in each Transcription Associated Protein (TAP) family in *Volvox* and *Chlamydomonas* are shown.

| <b>TAP</b>            | <b><i>Volvox</i></b> | <b><i>Chlamydomonas</i></b> |
|-----------------------|----------------------|-----------------------------|
| ABI3/VP1              | 1                    | 1                           |
| Alfin-like            | 1                    | 1                           |
| AP2/EREBP             | 21                   | 12                          |
| ARF                   | 0                    | 0                           |
| Argonaute             | 2                    | 3                           |
| ARID                  | 2                    | 3                           |
| AS2/LOB               | 0                    | 0                           |
| Aux/IAA               | 0                    | 0                           |
| BBR/BPC               | 0                    | 0                           |
| BES1                  | 0                    | 0                           |
| bHLH                  | 2                    | 3                           |
| bHSH                  | 0                    | 0                           |
| BSD domain containing | 3                    | 1                           |
| bZIP                  | 11                   | 6                           |
| C2C2_CO-like          | 2                    | 1                           |
| C2C2_Dof              | 1                    | 1                           |
| C2C2_GATA             | 9                    | 8                           |
| C2C2_YABBY            | 0                    | 0                           |
| C2H2                  | 8                    | 6                           |
| C3H                   | 23                   | 15                          |
| CAMTA                 | 0                    | 0                           |
| CCAAT_Dr1             | 0                    | 2                           |
| CCAAT_HAP2            | 0                    | 0                           |
| CCAAT_HAP3            | 3                    | 1                           |
| CCAAT_HAP5            | 2                    | 2                           |
| Coactivator p15       | 1                    | 1                           |
| CPP                   | 2                    | 1                           |
| CSD                   | 2                    | 1                           |



|                          |    |    |
|--------------------------|----|----|
| CudA                     | 0  | 0  |
| DBP                      | 0  | 0  |
| DDT                      | 0  | 0  |
| Dicer                    | 0  | 0  |
| DUF246 domain containing | 0  | 0  |
| DUF296 domain containing | 0  | 0  |
| DUF547 domain containing | 1  | 1  |
| DUF632 domain containing | 0  | 0  |
| DUF833 domain containing | 0  | 0  |
| E2F/DP                   | 3  | 3  |
| EIL                      | 0  | 0  |
| FHA                      | 11 | 12 |
| GARP_G2-like             | 4  | 4  |
| GARP_ARR-B               | 1  | 1  |
| GeBP                     | 0  | 0  |
| GIF                      | 1  | 1  |
| GNAT                     | 33 | 28 |
| GRAS                     | 0  | 0  |
| GRF                      | 0  | 0  |
| HB                       | 0  | 1  |
| HB_KNOX                  | 0  | 0  |
| HD-Zip                   | 0  | 0  |
| HMG                      | 9  | 7  |
| HRT                      | 0  | 0  |
| HSF                      | 2  | 2  |
| IWS1                     | 1  | 1  |
| Jumonji                  | 0  | 0  |
| LFY                      | 0  | 0  |
| LIM                      | 0  | 0  |
| LUG                      | 0  | 0  |
| MADS                     | 1  | 2  |
| MBF1                     | 1  | 1  |
| MED6                     | 0  | 1  |
| MED7                     | 1  | 0  |

|                |    |    |
|----------------|----|----|
| mTERF          | 3  | 1  |
| MYB-related    | 12 | 9  |
| MYB            | 19 | 15 |
| NAC            | 0  | 0  |
| NZZ            | 0  | 0  |
| OFP            | 0  | 0  |
| PcG_EZ         | 0  | 0  |
| PcG_FIE        | 1  | 1  |
| PcG_VEFS       | 0  | 0  |
| PHD            | 16 | 10 |
| PLATZ          | 3  | 4  |
| Pseudo ARR-B   | 0  | 2  |
| RB             | 0  | 1  |
| Rcd1-like      | 1  | 2  |
| Rel            | 0  | 0  |
| RF-X           | 0  | 0  |
| RRN3           | 1  | 0  |
| Runt           | 0  | 0  |
| RWP-RK         | 9  | 14 |
| S1Fa-like      | 0  | 0  |
| SAP            | 0  | 0  |
| SBP            | 20 | 21 |
| SET            | 16 | 13 |
| Sigma70-like   | 1  | 1  |
| Sin3           | 1  | 1  |
| Sir2           | 3  | 2  |
| SOH1           | 1  | 0  |
| SRS            | 0  | 0  |
| SWI/SNF_BAF60b | 1  | 2  |
| SWI/SNF_SNF2   | 26 | 18 |
| SWI/SNF_SWI3   | 0  | 0  |
| TAZ            | 4  | 2  |
| TCP            | 0  | 0  |
| TEA            | 0  | 0  |

|                               |            |            |
|-------------------------------|------------|------------|
| TFb2                          | 0          | 1          |
| TRAF                          | 20         | 28         |
| Trihelix                      | 0          | 0          |
| TUB                           | 3          | 2          |
| ULT                           | 0          | 0          |
| VARL                          | 13         | 9          |
| VOZ                           | 0          | 0          |
| Whirly                        | 1          | 1          |
| WRKY                          | 2          | 1          |
| zf_HD                         | 0          | 0          |
| tify                          | 0          | 0          |
| Zinc finger, AN1 and A20 type | 2          | 1          |
| Zinc finger, MIZ type         | 2          | 0          |
| Zinc finger, ZPR1             | 1          | 1          |
| Zn_clus                       | 0          | 0          |
| <b>Total</b>                  | <b>347</b> | <b>297</b> |

### Table S16: Summary of RepeatScout libraries

A summary of the number of repeat sequences (and their mean length) generated from running RepeatScout on the *Volvox* and *Chlamydomonas* assemblies is shown.

|                                                                              | <i>Volvox</i> | <i>Chlamydomonas</i> |
|------------------------------------------------------------------------------|---------------|----------------------|
| Sequences in raw repeat library                                              | 1,511         | 1,057                |
| Putative novel repeat sequences                                              | 122           | 58                   |
| Mean repeat sequence length                                                  | 919           | 595                  |
| No. sequences left after removing unknown sequences with non-TE Pfam domains | 1,449         | 1,013                |

## 5) SUPPLEMENTAL REFERENCES

- S1. C. R. Adams *et al.*, *Curr Genet* **18**, 141 (1990).
- S2. R. C. Starr, *Arch Protistenkd* **111**, 204 (1969).
- S3. R. C. Starr, *Dev Biol Suppl* **4**, 59 (1970).
- S4. D. R. Smith, R. W. Lee, *BMC Genomics* **10**, 132 (2009).
- S5. J. L. Weber, E. W. Myers, *Genome Res* **7**, 401 (May, 1997).
- S6. B. Ewing, L. Hillier, M. C. Wendl, P. Green, *Genome Res* **8**, 175 (Mar, 1998).
- S7. S. Aparicio *et al.*, *Science* **297**, 1301 (Aug 23, 2002).
- S8. D. A. Benson, I. Karsch-Mizrachi, D. J. Lipman, J. Ostell, E. W. Sayers, *Nucleic Acids Res* **37**, D26 (Jan, 2009).
- S9. W. J. Kent, *Genome Res* **12**, 656 (Apr, 2002).
- S10. S. F. Altschul, W. Gish, W. Miller, E. W. Myers, D. J. Lipman, *J Mol Biol* **215**, 403 (Oct 5, 1990).
- S11. T. U. Consortium, *Nucleic Acids Res* **38**, D142 (Jan, 2010).
- S12. A. F. A. Smit, R. Hubley, P. Green, <http://www.repeatmasker.org>, (1996-2004).
- S13. J. Jurka *et al.*, *Cytogenet Genome Res* **110**, 462 (2005).
- S14. S. S. Merchant *et al.*, *Science* **318**, 245 (Oct 12, 2007).
- S15. A. L. Price, N. C. Jones, P. A. Pevzner, *Bioinformatics* **21 Suppl 1**, i351 (Jun, 2005).
- S16. S. R. Eddy, *Bioinformatics* **14**, 755 (1998).
- S17. T. M. Lowe, S. R. Eddy, *Nucleic Acids Res* **25**, 955 (Mar 1, 1997).
- S18. E. Quevillon *et al.*, *Nucleic Acids Res* **33**, W116 (Jul 1, 2005).
- S19. G. A. Tuskan *et al.*, *Science* **313**, 1596 (Sep 15, 2006).
- S20. A. Coghlan, E. E. Eichler, S. G. Oliver, A. H. Paterson, L. Stein, *Trends Genet* **21**, 673 (Dec, 2005).
- S21. J. C. Detter *et al.*, *Genomics* **80**, 691 (Dec, 2002).
- S22. B. Ewing, P. Green, *Genome Res* **8**, 186 (Mar, 1998).
- S23. T. G. I. Project.
- S24. X. Huang, A. Madan, *Genome Res* **9**, 868 (Sep, 1999).
- S25. A. Z. Worden *et al.*, *Science* **324**, 268 (Apr 10, 2009).
- S26. A. Y. Guo *et al.*, *Nucleic Acids Res* **36**, D966 (Jan, 2008).
- S27. D. M. Riano-Pachon, S. Ruzicic, I. Dreyer, B. Mueller-Roeber, *BMC Bioinformatics* **8**, 42 (2007).
- S28. S. Richardt, D. Lang, R. Reski, W. Frank, S. A. Rensing, *Plant Physiol* **143**, 1452 (Apr, 2007).
- S29. R. D. Finn *et al.*, *Nucleic Acids Res* **36**, D281 (Jan, 2008).
- S30. P. Perez-Rodriguez *et al.*, *Nucleic Acids Res* **38**, D822 (Jan, 2009).
- S31. K. Katoh, K. Kuma, H. Toh, T. Miyata, *Nucleic Acids Res* **33**, 511 (2005).
- S32. M. Clamp, J. Cuff, S. M. Searle, G. J. Barton, *Bioinformatics* **20**, 426 (Feb 12, 2004).
- S33. A. Sanderfoot, *Plant Physiol* **144**, 6 (May, 2007).

- S34. S. Rutherford, I. Moore, *Curr Opin Plant Biol* **5**, 518 (Dec, 2002).
- S35. J. D. Thompson, T. J. Gibson, F. Plewniak, F. Jeanmougin, D. G. Higgins, *Nucleic Acids Res* **25**, 4876 (Dec 15, 1997).
- S36. R. C. Edgar, *Nucleic Acids Res* **32**, 1792 (2004).
- S37. D. Swofford. (Sinauer Associates, Sunderland, MA, 2003).
- S38. K. Bisova, D. M. Krylov, J. G. Umen, *Plant Physiol* **137**, 475 (Feb, 2005).
- S39. M. Berriman *et al.*, *Science* **309**, 416 (Jul 15, 2005).
- S40. A. Hallmann, *Int Rev Cytol* **227**, 131 (2003).
- S41. E. H. Harris, Stern, D.B., and Witman, G.B., *The Chlamydomonas Sourcebook*. (Academic Press, 2009).
- S42. F. Abascal, R. Zardoya, D. Posada, *Bioinformatics* **21**, 2104 (May 1, 2005).
- S43. S. Guindon, O. Gascuel, *Syst Biol* **52**, 696 (Oct, 2003).
- S44. S. Guindon, F. Lethiec, P. Duroux, O. Gascuel, *Nucleic Acids Res* **33**, W557 (Jul 1, 2005).
- S45. E. Szathmary, J. M. Smith, *Nature* **374**, 227 (Mar 16, 1995).
- S46. J. T. Bonner, *Integr Biol* **1**, 27 (1998).
- S47. S. L. Baldauf, *Science* **300**, 1703 (Jun 13, 2003).
- S48. R. K. Grosberg, R. Strathmann, *Annu Rev Ecol Evol Syst* **38**, 621 (2007).
- S49. G. A. Wray, *Genome Biol* **3**, REVIEWS0001 (2002).
- S50. H. S. Yoon, J. D. Hackett, C. Ciniglia, G. Pinto, D. Bhattacharya, *Mol Biol Evol* **21**, 809 (May, 2004).
- S51. M. D. Herron, J. D. Hackett, F. O. Aylward, R. E. Michod, *Proc Natl Acad Sci U S A* **106**, 3254 (Mar 3, 2009).
- S52. H. Rausch, N. Larsen, R. Schmitt, *J Mol Evol* **29**, 255 (Sep, 1989).
- S53. T. Nakada, K. Misawa, H. Nozaki, *Mol Phylogenet Evol* **48**, 281 (Jul, 2008).
- S54. H. Nozaki, *Biologia, Bratislava* **58**, 425 (2003).
- S55. S. M. Miller, D. L. Kirk, *Development* **126**, 649 (Feb, 1999).
- S56. Q. Cheng, R. Fowler, L. W. Tam, L. Edwards, S. M. Miller, *Dev Genes Evol* **213**, 328 (Jul, 2003).
- S57. I. Nishii, S. Ogihara, D. L. Kirk, *Cell* **113**, 743 (Jun 13, 2003).
- S58. M. M. Kirk *et al.*, *Development* **126**, 639 (Feb, 1999).
- S59. M. Meissner, K. Stark, B. Cresnar, D. L. Kirk, R. Schmitt, *Curr Genet* **36**, 363 (Dec, 1999).
- S60. L. Duncan *et al.*, *J Mol Evol* **65**, 1 (Jul, 2007).
- S61. H. Gruber, S. D. Goetinck, D. L. Kirk, R. Schmitt, *Gene* **120**, 75 (Oct 12, 1992).
- S62. A. Hallmann, A. Rappel, *Plant J* **17**, 99 (Jan, 1999).
- S63. T. Jakobiak *et al.*, *Protist* **155**, 381 (Dec, 2004).
- S64. A. Hallmann, S. Wodniok, *Plant Cell Rep* **25**, 582 (Jun, 2006).
- S65. S. M. Miller, R. Schmitt, D. L. Kirk, *Plant Cell* **5**, 1125 (Sep, 1993).
- S66. N. Ueki, I. Nishii, *Genetics* **180**, 1343 (Nov, 2008).
- S67. B. Schiedlmeier *et al.*, *Proc Natl Acad Sci U S A* **91**, 5080 (May 24, 1994).
- S68. A. Hallmann, M. Sumper, *Eur J Biochem* **221**, 143 (Apr 1, 1994).

- S69. D. L. Kirk, *Bioessays* **27**, 299 (Mar, 2005).
- S70. P. Ferris *et al.*, *Science* **328**, 351 (Apr 16, 2010).
- S71. A. Hallmann, K. Godl, S. Wenzl, M. Sumper, *Trends Microbiol* **6**, 185 (May, 1998).
- S72. A. Hallmann, *Planta* **226**, 719 (Aug, 2007).
- S73. N. Aono, T. Inoue, H. Shiraishi, *J Biochem* **138**, 375 (Oct, 2005).
- S74. A. Hallmann, *Plant J* **45**, 292 (Jan, 2006).
- S75. D. Kirk, *Volvox: Molecular-genetic origins of multicellularity and cellular differentiation*. (Cambridge University Press, Cambridge, 1998).
- S76. D. Stern, G. Witman, E. Harris, (Jan 1, 2009).
- S77. T. Kubo, J. Abe, T. Saito, Y. Matsuda, *Curr Genet* **41**, 115 (May, 2002).
- S78. T. Hamaji *et al.*, *Genetics* **178**, 283 (Jan, 2008).
- S79. H. Nozaki, T. Mori, O. Misumi, S. Matsunaga, T. Kuroiwa, *Curr Biol* **16**, R1018 (Dec 19, 2006).
- S80. D. L. Kirk, R. Birchem, N. King, *J Cell Sci* **80**, 207 (Feb, 1986).
- S81. R. R. Reisz, J. Muller, *Trends Genet* **20**, 237 (May, 2004).
- S82. M. Goodman, G. W. Moore, G. Matsuda, *Nature* **253**, 603 (Feb 20, 1975).
- S83. H. Wang *et al.*, *Proc Natl Acad Sci U S A* **106**, 3853 (Mar 10, 2009).
- S84. C. Bowler *et al.*, *Nature* **456**, 239 (Nov 13, 2008).
